# Supplementary material for: Resveratrol: Multi-Targets Mechanism on Neurodegenerative Diseases Based on Network Pharmacology
Source: Front Pharmacol. 2020 May 14;11:694. doi: 10.3389/fphar.2020.00694 (PMC7240052; doi:10.3389/fphar.2020.00694)
Supplement: Supplementary Table 3 — The enriched GO terms and KEGG pathways based upon DAVID database. [file Table_3.xlsx]

## Sheet: BP
Category	Term	Count	%	PValue	Genes	List Total	Pop Hits	Pop Total	Fold Enrichment	Bonferroni	Benjamini	FDR
GOTERM_BP_DIRECT	GO:0008630~intrinsic apoptotic signaling pathway in response to DNA damage	10	0.0473709	1.22665e-12	BAK1, TNF, CASP9, MCL1, BCL2, BAX, BCL2A1, BCL2L1, BRCA1, SOD2	114	25	11368	39.8877	1.66707e-09	1.66707e-09	2.01384e-09
GOTERM_BP_DIRECT	GO:0097192~extrinsic apoptotic signaling pathway in absence of ligand	7	0.0331596	2.06101e-08	BAK1, MCL1, BCL2, BAX, BCL2A1, BCL2L1, IL1A	114	19	11368	36.7387	2.80088e-05	1.40045e-05	3.38355e-05
GOTERM_BP_DIRECT	GO:0001836~release of cytochrome c from mitochondria	6	0.0284225	3.91137e-08	BAK1, BCL2, BAX, BCL2A1, BCL2L1, SOD2	114	11	11368	54.3923	5.31542e-05	1.77184e-05	6.42127e-05
GOTERM_BP_DIRECT	GO:0043066~negative regulation of apoptotic process	14	0.0663193	6.78032e-08	CDK1, BCL2A1, TP53, FOXO1, BIRC5, SIRT1, PTEN, STAT3, IGF1R, CASP3, ALB, BCL2, HSPA5, MYC	114	196	11368	7.12281	9.21403e-05	2.30359e-05	0.000111312
GOTERM_BP_DIRECT	GO:0043525~positive regulation of neuron apoptotic process	6	0.0284225	1.65502e-07	CASP9, BBC3, BAX, TP53, DDIT3, CTNNB1	114	14	11368	42.7368	0.000224891	4.49823e-05	0.000271702
GOTERM_BP_DIRECT	GO:0045944~positive regulation of transcription from RNA polymerase II promoter	19	0.0900047	2.65933e-07	TNF, RELA, XRCC6, PPARG, TP53, FOXO1, NFKBIA, CDK7, SIRT1, TGFB1, IL10, AHR, SIRT2, BRCA1, CTNNB1, APP, MAPK3, MYC, IL1A	114	436	11368	4.34557	0.000361338	6.02321e-05	0.00043658
GOTERM_BP_DIRECT	GO:0010332~response to gamma radiation	6	0.0284225	6.86161e-07	BAK1, BCL2, BAX, TP53, MYC, SOD2	114	18	11368	33.2398	0.000932059	0.000133204	0.00112646
GOTERM_BP_DIRECT	GO:0031663~lipopolysaccharide-mediated signaling pathway	6	0.0284225	6.86161e-07	MAPK1, CCL2, TNF, MAPK3, NFKBIA, TGFB1	114	18	11368	33.2398	0.000932059	0.000133204	0.00112646
GOTERM_BP_DIRECT	GO:0018107~peptidyl-threonine phosphorylation	6	0.0284225	9.23858e-07	CDK1, MAPK1, BCL2, FOXO1, PRKACA, MTOR	114	19	11368	31.4903	0.00125474	0.000156928	0.00151668
GOTERM_BP_DIRECT	GO:0006351~transcription, DNA-templated	15	0.0710564	1.02801e-06	SREBF1, PPARA, CREBZF, PPARG, ESR1, TP53, FOXO1, BIRC5, STAT1, AHR, STAT3, NR1I2, MAPK3, MYC, NR1H3	114	290	11368	5.15789	0.00139608	0.000155217	0.00168766
GOTERM_BP_DIRECT	GO:0006919~activation of cysteine-type endopeptidase activity involved in apoptotic process	7	0.0331596	1.08331e-06	XDH, TNF, CASP9, SNCA, PPARG, STAT1, MYC	114	35	11368	19.9439	0.00147114	0.000147211	0.00177845
GOTERM_BP_DIRECT	GO:0043497~regulation of protein heterodimerization activity	4	0.0189484	3.7982e-06	BAK1, CDC42, BCL2, BAX	114	4	11368	99.7193	0.00514846	0.000469141	0.00623529
GOTERM_BP_DIRECT	GO:0045599~negative regulation of fat cell differentiation	6	0.0284225	7.27063e-06	FOXO1, SIRT1, DDIT3, TGFB1, SIRT2, SOD2	114	28	11368	21.3684	0.00983216	0.000823062	0.0119355
GOTERM_BP_DIRECT	GO:0090200~positive regulation of release of cytochrome c from mitochondria	5	0.0236855	1.16114e-05	TNFSF10, BBC3, MMP9, BAX, TP53	114	15	11368	33.2398	0.0156562	0.00121311	0.0190607
GOTERM_BP_DIRECT	GO:0070059~intrinsic apoptotic signaling pathway in response to endoplasmic reticulum stress	5	0.0236855	1.16114e-05	BAK1, BBC3, BCL2, BAX, DDIT3	114	15	11368	33.2398	0.0156562	0.00121311	0.0190607
GOTERM_BP_DIRECT	GO:0010629~negative regulation of gene expression	7	0.0331596	3.61756e-05	XDH, CDC42, PPARG, FOXO1, GJA1, SIRT1, TGFB1	114	63	11368	11.0799	0.0479746	0.00350552	0.0593727
GOTERM_BP_DIRECT	GO:0051881~regulation of mitochondrial membrane potential	5	0.0236855	4.86198e-05	BAK1, BCL2, BAX, BCL2L1, SOD2	114	21	11368	23.7427	0.0639403	0.00439538	0.0797889
GOTERM_BP_DIRECT	GO:0034097~response to cytokine	5	0.0236855	4.86198e-05	MCL1, BCL2, RELA, BCL2L1, STAT1	114	21	11368	23.7427	0.0639403	0.00439538	0.0797889
GOTERM_BP_DIRECT	GO:0033138~positive regulation of peptidyl-serine phosphorylation	6	0.0284225	5.63308e-05	CDC42, TNF, BCL2, VEGFA, SNCA, TGFB1	114	42	11368	14.2456	0.0736987	0.0047733	0.0924377
GOTERM_BP_DIRECT	GO:0034644~cellular response to UV	5	0.0236855	5.89702e-05	BAK1, CASP9, EIF2S1, BAX, TP53	114	22	11368	22.6635	0.0770156	0.00470319	0.096767
GOTERM_BP_DIRECT	GO:0051781~positive regulation of cell division	5	0.0236855	8.43586e-05	VEGFA, TGFA, TGFB1, IL1A, SIRT2	114	24	11368	20.7749	0.10832	0.0063491	0.138401
GOTERM_BP_DIRECT	GO:0043491~protein kinase B signaling	5	0.0236855	8.43586e-05	CCL2, TNF, PTEN, TGFB1, SIRT2	114	24	11368	20.7749	0.10832	0.0063491	0.138401
GOTERM_BP_DIRECT	GO:0006954~inflammatory response	10	0.0473709	9.97508e-05	CCL2, C5AR1, PTGS2, RELA, PTGS1, CCR2, CXCL8, NFE2L2, TGFB1, IL10	114	187	11368	5.33258	0.12678	0.00710977	0.163634
GOTERM_BP_DIRECT	GO:0045893~positive regulation of transcription, DNA-templated	10	0.0473709	0.00014268	NR1I2, PTGES2, PPARG, ESR1, NFE2L2, STAT1, MYC, TGFB1, STAT3, CTNNB1	114	196	11368	5.08772	0.176272	0.00964892	0.233979
GOTERM_BP_DIRECT	GO:0010875~positive regulation of cholesterol efflux	4	0.0189484	0.000148898	PPARG, NFKBIA, SIRT1, NR1H3	114	11	11368	36.2616	0.183206	0.00959029	0.244165
GOTERM_BP_DIRECT	GO:0018105~peptidyl-serine phosphorylation	7	0.0331596	0.000149484	PRKCA, CDK1, MAPK1, BCL2, FOXO1, PRKACA, MTOR	114	81	11368	8.61772	0.183856	0.00919224	0.245125
GOTERM_BP_DIRECT	GO:0045429~positive regulation of nitric oxide biosynthetic process	4	0.0189484	0.000321404	TNF, HSP90AA1, ESR1, SOD2	114	14	11368	28.4912	0.353937	0.0188146	0.526342
GOTERM_BP_DIRECT	GO:0042593~glucose homeostasis	6	0.0284225	0.000365943	PPARG, ADIPOR2, MTNR1B, FOXO1, ADIPOR1, STAT3	114	62	11368	9.65025	0.391895	0.020512	0.599075
GOTERM_BP_DIRECT	GO:0051402~neuron apoptotic process	4	0.0189484	0.000398852	APP, BCL2, BAX, BCL2L1	114	15	11368	26.5918	0.418502	0.0214525	0.652784
GOTERM_BP_DIRECT	GO:0045766~positive regulation of angiogenesis	6	0.0284225	0.000489724	PRKCA, C5AR1, VEGFA, SIRT1, IL1A, BRCA1	114	66	11368	9.06539	0.486085	0.0252788	0.800948
GOTERM_BP_DIRECT	GO:0043524~negative regulation of neuron apoptotic process	6	0.0284225	0.000562298	CCL2, BCL2, NTRK1, BAX, SNCA, BCL2L1	114	68	11368	8.79876	0.534377	0.0279133	0.919131
GOTERM_BP_DIRECT	GO:0046902~regulation of mitochondrial membrane permeability	3	0.0142113	0.000580025	BAK1, BCL2, BCL2L1	114	4	11368	74.7895	0.545466	0.0277673	0.947977
GOTERM_BP_DIRECT	GO:0010887~negative regulation of cholesterol storage	3	0.0142113	0.000580025	PPARA, PPARG, NR1H3	114	4	11368	74.7895	0.545466	0.0277673	0.947977
GOTERM_BP_DIRECT	GO:0060440~trachea formation	3	0.0142113	0.000580025	MAPK1, MAPK3, CTNNB1	114	4	11368	74.7895	0.545466	0.0277673	0.947977
GOTERM_BP_DIRECT	GO:2001243~negative regulation of intrinsic apoptotic signaling pathway	4	0.0189484	0.00058751	MCL1, BCL2, MMP9, BCL2L1	114	17	11368	23.4634	0.550069	0.0271642	0.960155
GOTERM_BP_DIRECT	GO:0070374~positive regulation of ERK1 and ERK2 cascade	7	0.0331596	0.000611341	ALOX15, CCL2, C5AR1, NTRK1, MAPK3, PTEN, TGFB1	114	105	11368	6.64795	0.564415	0.027322	0.998918
GOTERM_BP_DIRECT	GO:0042149~cellular response to glucose starvation	4	0.0189484	0.000825165	BCL2, TP53, NFE2L2, HSPA5	114	19	11368	20.9935	0.674327	0.0355421	1.34608
GOTERM_BP_DIRECT	GO:0071456~cellular response to hypoxia	5	0.0236855	0.000847279	BCL2, TP53, MTOR, PTEN, SIRT1	114	43	11368	11.5953	0.683977	0.0353579	1.38192
GOTERM_BP_DIRECT	GO:0043496~regulation of protein homodimerization activity	3	0.0142113	0.000960423	BAK1, BCL2, BAX	114	5	11368	59.8316	0.729056	0.0387983	1.5651
GOTERM_BP_DIRECT	GO:0031641~regulation of myelination	3	0.0142113	0.000960423	MTOR, SIRT2, CTNNB1	114	5	11368	59.8316	0.729056	0.0387983	1.5651
GOTERM_BP_DIRECT	GO:0032270~positive regulation of cellular protein metabolic process	3	0.0142113	0.000960423	AGTR1, NFKBIA, TGFB1	114	5	11368	59.8316	0.729056	0.0387983	1.5651
GOTERM_BP_DIRECT	GO:0008635~activation of cysteine-type endopeptidase activity involved in apoptotic process by cytochrome c	3	0.0142113	0.000960423	BAK1, BAX, APAF1	114	5	11368	59.8316	0.729056	0.0387983	1.5651
GOTERM_BP_DIRECT	GO:0006468~protein phosphorylation	6	0.0284225	0.00111502	CCNE1, APP, BIRC5, PRKACA, CDK4, TGFB1	114	79	11368	7.57362	0.780445	0.043613	1.81486
GOTERM_BP_DIRECT	GO:0045931~positive regulation of mitotic cell cycle	4	0.0189484	0.00111631	CCNB1, PRKCA, APP, BIRC5	114	21	11368	18.9942	0.780831	0.042442	1.81695
GOTERM_BP_DIRECT	GO:0010745~negative regulation of macrophage derived foam cell differentiation	3	0.0142113	0.00143128	PPARA, PPARG, NFKBIA	114	6	11368	49.8596	0.857227	0.0526336	2.32397
GOTERM_BP_DIRECT	GO:0051091~positive regulation of sequence-specific DNA binding transcription factor activity	5	0.0236855	0.00161428	PPARG, ESR1, PTEN, IL10, CTNNB1	114	51	11368	9.7764	0.888706	0.0576138	2.61743
GOTERM_BP_DIRECT	GO:0006979~response to oxidative stress	5	0.0236855	0.00186301	APP, PTGS2, PTGS1, DUOX2, NQO1	114	53	11368	9.40748	0.920674	0.0645141	3.01496
GOTERM_BP_DIRECT	GO:0032355~response to estradiol	3	0.0142113	0.00199078	TGFB1, STAT3, CTNNB1	114	7	11368	42.7368	0.933341	0.0670841	3.21857
GOTERM_BP_DIRECT	GO:0051384~response to glucocorticoid	3	0.0142113	0.00199078	TNF, BCL2, IL10	114	7	11368	42.7368	0.933341	0.0670841	3.21857
GOTERM_BP_DIRECT	GO:0042493~response to drug	5	0.0236855	0.00199681	BCL2, SNCA, CDK4, MYC, CTNNB1	114	54	11368	9.23327	0.933886	0.065655	3.22817
GOTERM_BP_DIRECT	GO:0021762~substantia nigra development	4	0.0189484	0.00210485	CDC42, MAOB, HSPA5, SIRT2	114	26	11368	15.3414	0.942932	0.0674585	3.40002
GOTERM_BP_DIRECT	GO:0034599~cellular response to oxidative stress	4	0.0189484	0.00210485	SNCA, FOXO1, NFE2L2, SIRT2	114	26	11368	15.3414	0.942932	0.0674585	3.40002
GOTERM_BP_DIRECT	GO:0051898~negative regulation of protein kinase B signaling	4	0.0189484	0.00235094	XDH, PTEN, SIRT1, DDIT3	114	27	11368	14.7732	0.959184	0.0733313	3.79036
GOTERM_BP_DIRECT	GO:0051726~regulation of cell cycle	5	0.0236855	0.00243789	CCNE2, BAK1, CCNE1, BAX, STAT3	114	57	11368	8.74731	0.963743	0.0742422	3.92792
GOTERM_BP_DIRECT	GO:0006983~ER overload response	3	0.0142113	0.00263716	TP53, HSPA5, DDIT3	114	8	11368	37.3947	0.972364	0.0783224	4.2425
GOTERM_BP_DIRECT	GO:0045892~negative regulation of transcription, DNA-templated	8	0.0378967	0.00275597	CREBZF, XRCC6, TP53, RUNX1T1, BIRC5, TGFB1, BRCA1, CTNNB1	114	189	11368	4.22092	0.976495	0.0799665	4.4296
GOTERM_BP_DIRECT	GO:0006915~apoptotic process	6	0.0284225	0.0027688	APP, SNCA, TP53, FOXO1, BIRC5, STAT1	114	97	11368	6.1682	0.976902	0.0786484	4.44979
GOTERM_BP_DIRECT	GO:0043065~positive regulation of apoptotic process	6	0.0284225	0.00289493	BAX, BCL2A1, FOXO1, BCL2L1, BCL2L11, CTNNB1	114	98	11368	6.10526	0.98055	0.0804104	4.64798
GOTERM_BP_DIRECT	GO:0048146~positive regulation of fibroblast proliferation	4	0.0189484	0.00319338	CCNB1, ITGB3, CDK4, MYC	114	30	11368	13.2959	0.987051	0.0865781	5.11546
GOTERM_BP_DIRECT	GO:0032869~cellular response to insulin stimulus	4	0.0189484	0.00319338	SLC2A4, PPARG, FOXO1, STAT1	114	30	11368	13.2959	0.987051	0.0865781	5.11546
GOTERM_BP_DIRECT	GO:0035729~cellular response to hepatocyte growth factor stimulus	3	0.0142113	0.00336866	HGF, SIRT2, IL10	114	9	11368	33.2398	0.989804	0.0893406	5.38899
GOTERM_BP_DIRECT	GO:0042789~mRNA transcription from RNA polymerase II promoter	3	0.0142113	0.00336866	C5AR1, DDIT3, STAT3	114	9	11368	33.2398	0.989804	0.0893406	5.38899
GOTERM_BP_DIRECT	GO:2000811~negative regulation of anoikis	3	0.0142113	0.00336866	MCL1, ITGA5, BCL2	114	9	11368	33.2398	0.989804	0.0893406	5.38899
GOTERM_BP_DIRECT	GO:0050731~positive regulation of peptidyl-tyrosine phosphorylation	4	0.0189484	0.00351017	ITGA5, VEGFA, HGF, MTOR	114	31	11368	12.867	0.991593	0.091149	5.60929
GOTERM_BP_DIRECT	GO:0045840~positive regulation of mitotic nuclear division	3	0.0142113	0.00418355	EDN1, TGFA, IL1A	114	10	11368	29.9158	0.996645	0.105699	6.65101
GOTERM_BP_DIRECT	GO:0001782~B cell homeostasis	3	0.0142113	0.00418355	BAK1, BCL2, BAX	114	10	11368	29.9158	0.996645	0.105699	6.65101
GOTERM_BP_DIRECT	GO:1902042~negative regulation of extrinsic apoptotic signaling pathway via death domain receptors	3	0.0142113	0.00418355	CFLAR, HGF, BRCA1	114	10	11368	29.9158	0.996645	0.105699	6.65101
GOTERM_BP_DIRECT	GO:0048538~thymus development	4	0.0189484	0.00457316	MAPK1, BCL2, MAPK3, CTNNB1	114	34	11368	11.7317	0.998029	0.112895	7.24879
GOTERM_BP_DIRECT	GO:2000379~positive regulation of reactive oxygen species metabolic process	3	0.0142113	0.00508014	XDH, TP53, NFE2L2	114	11	11368	27.1962	0.999014	0.122426	8.02127
GOTERM_BP_DIRECT	GO:0030308~negative regulation of cell growth	5	0.0236855	0.00539293	BCL2, TP53, GJA1, SIRT1, TGFB1	114	71	11368	7.02249	0.999357	0.127235	8.49485
GOTERM_BP_DIRECT	GO:0008053~mitochondrial fusion	3	0.0142113	0.00605675	BAK1, BAX, BCL2A1	114	12	11368	24.9298	0.99974	0.139388	9.49233
GOTERM_BP_DIRECT	GO:0031069~hair follicle morphogenesis	3	0.0142113	0.00605675	CDC42, BCL2, CTNNB1	114	12	11368	24.9298	0.99974	0.139388	9.49233
GOTERM_BP_DIRECT	GO:0050715~positive regulation of cytokine secretion	3	0.0142113	0.00605675	TNF, IL1A, IL10	114	12	11368	24.9298	0.99974	0.139388	9.49233
GOTERM_BP_DIRECT	GO:0008285~negative regulation of cell proliferation	7	0.0331596	0.00619079	NTRK1, PTEN, TGFB1, IL1A, SIRT2, STAT3, CTNNB1	114	166	11368	4.20503	0.999784	0.139898	9.6925
GOTERM_BP_DIRECT	GO:0071356~cellular response to tumor necrosis factor	4	0.0189484	0.00774748	CCL2, NFE2L2, SIRT1, BRCA1	114	41	11368	9.72871	0.999974	0.169258	11.9869
GOTERM_BP_DIRECT	GO:0048147~negative regulation of fibroblast proliferation	3	0.0142113	0.00824345	BAX, TP53, SOD2	114	14	11368	21.3684	0.999987	0.176303	12.7064
GOTERM_BP_DIRECT	GO:0009611~response to wounding	3	0.0142113	0.00824345	CCL2, GJA1, TGFB1	114	14	11368	21.3684	0.999987	0.176303	12.7064
GOTERM_BP_DIRECT	GO:0010575~positive regulation of vascular endothelial growth factor production	3	0.0142113	0.00824345	C5AR1, IL1A, BRCA1	114	14	11368	21.3684	0.999987	0.176303	12.7064
GOTERM_BP_DIRECT	GO:0010800~positive regulation of peptidyl-threonine phosphorylation	3	0.0142113	0.00945031	MAPK1, PRKAG2, TGFB1	114	15	11368	19.9439	0.999998	0.196447	14.4341
GOTERM_BP_DIRECT	GO:0007281~germ cell development	3	0.0142113	0.00945031	BAX, BCL2L1, MTOR	114	15	11368	19.9439	0.999998	0.196447	14.4341
GOTERM_BP_DIRECT	GO:0007050~cell cycle arrest	4	0.0189484	0.0106446	CDKN1A, TP53, DDIT3, TGFB1	114	46	11368	8.67124	1	0.215253	16.1121
GOTERM_BP_DIRECT	GO:0043401~steroid hormone mediated signaling pathway	3	0.0142113	0.0107307	PPARA, NR1I2, PPARG	114	16	11368	18.6974	1	0.213654	16.2319
GOTERM_BP_DIRECT	GO:0033137~negative regulation of peptidyl-serine phosphorylation	3	0.0142113	0.0107307	BAK1, BAX, HGF	114	16	11368	18.6974	1	0.213654	16.2319
GOTERM_BP_DIRECT	GO:0048661~positive regulation of smooth muscle cell proliferation	3	0.0142113	0.0107307	TNF, EDN1, STAT1	114	16	11368	18.6974	1	0.213654	16.2319
GOTERM_BP_DIRECT	GO:2000378~negative regulation of reactive oxygen species metabolic process	3	0.0142113	0.0107307	BCL2, BRCA1, SIRT2	114	16	11368	18.6974	1	0.213654	16.2319
GOTERM_BP_DIRECT	GO:0008284~positive regulation of cell proliferation	7	0.0331596	0.0108211	TGFA, HGF, BCL2L1, STAT1, MYC, PTEN, TGFB1	114	187	11368	3.73281	1	0.212179	16.3574
GOTERM_BP_DIRECT	GO:0051301~cell division	4	0.0189484	0.0112894	CDK1, CCND2, BIRC5, CDK4	114	47	11368	8.48675	1	0.217228	17.0052
GOTERM_BP_DIRECT	GO:0055114~oxidation-reduction process	6	0.0284225	0.0117515	ALOX15, CBR1, MAOB, DUOX2, SOD2, CYP19A1	114	137	11368	4.36727	1	0.221989	17.6397
GOTERM_BP_DIRECT	GO:0046777~protein autophosphorylation	5	0.0236855	0.0118313	IGF1R, EIF2S1, NTRK1, PRKACA, MTOR	114	89	11368	5.60221	1	0.220296	17.7488
GOTERM_BP_DIRECT	GO:0071158~positive regulation of cell cycle arrest	3	0.0142113	0.0120832	TP53, PRKACA, BRCA1	114	17	11368	17.5975	1	0.221447	18.0923
GOTERM_BP_DIRECT	GO:0032715~negative regulation of interleukin-6 production	3	0.0142113	0.0120832	TNF, HGF, IL10	114	17	11368	17.5975	1	0.221447	18.0923
GOTERM_BP_DIRECT	GO:0000122~negative regulation of transcription from RNA polymerase II promoter	9	0.0426338	0.0131747	TNF, RELA, EDN1, PPARG, TP53, SIRT1, DDIT3, CTNNB1, NR1H3	114	315	11368	2.84912	1	0.235862	19.5654
GOTERM_BP_DIRECT	GO:0043123~positive regulation of I-kappaB kinase/NF-kappaB signaling	5	0.0236855	0.0132376	CFLAR, TNFSF10, GJA1, IL1A, CTNNB1	114	92	11368	5.41953	1	0.233809	19.6495
GOTERM_BP_DIRECT	GO:0045662~negative regulation of myoblast differentiation	3	0.0142113	0.0135061	TNF, DDIT3, TGFB1	114	18	11368	16.6199	1	0.234957	20.0076
GOTERM_BP_DIRECT	GO:0006955~immune response	7	0.0331596	0.0140401	TNFSF10, IL6, CCR2, CXCL8, IL1A, IL10, CD28	114	198	11368	3.52543	1	0.240056	20.7156
GOTERM_BP_DIRECT	GO:2001240~negative regulation of extrinsic apoptotic signaling pathway in absence of ligand	3	0.0142113	0.0149979	TNF, MCL1, BCL2	114	19	11368	15.7452	1	0.251173	21.9706
GOTERM_BP_DIRECT	GO:0071479~cellular response to ionizing radiation	3	0.0142113	0.0149979	BBC3, TP53, SIRT1	114	19	11368	15.7452	1	0.251173	21.9706
GOTERM_BP_DIRECT	GO:0042771~intrinsic apoptotic signaling pathway in response to DNA damage by p53 class mediator	3	0.0142113	0.0149979	BBC3, TP53, SIRT1	114	19	11368	15.7452	1	0.251173	21.9706
GOTERM_BP_DIRECT	GO:0035987~endodermal cell differentiation	3	0.0142113	0.0165573	ITGA5, MMP9, MMP2	114	20	11368	14.9579	1	0.27031	23.974
GOTERM_BP_DIRECT	GO:0043280~positive regulation of cysteine-type endopeptidase activity involved in apoptotic process	3	0.0142113	0.0165573	TNFSF10, MYC, SIRT1	114	20	11368	14.9579	1	0.27031	23.974
GOTERM_BP_DIRECT	GO:0030878~thyroid gland development	3	0.0142113	0.0165573	MAPK1, MAPK3, DUOX2	114	20	11368	14.9579	1	0.27031	23.974
GOTERM_BP_DIRECT	GO:0001666~response to hypoxia	4	0.0189484	0.0172526	PLAT, EDN1, VEGFA, MMP2	114	55	11368	7.25231	1	0.276738	24.8517
GOTERM_BP_DIRECT	GO:0000060~protein import into nucleus, translocation	3	0.0142113	0.0181827	TNF, NFKBIA, TGFB1	114	21	11368	14.2456	1	0.286088	26.0108
GOTERM_BP_DIRECT	GO:0001541~ovarian follicle development	3	0.0142113	0.0181827	BCL2, BAX, BCL2L1	114	21	11368	14.2456	1	0.286088	26.0108
GOTERM_BP_DIRECT	GO:0048597~post-embryonic camera-type eye morphogenesis	2	0.00947418	0.0197824	BAK1, BAX	114	2	11368	99.7193	1	0.303753	27.9653
GOTERM_BP_DIRECT	GO:0006808~regulation of nitrogen utilization	2	0.00947418	0.0197824	BCL2, BAX	114	2	11368	99.7193	1	0.303753	27.9653
GOTERM_BP_DIRECT	GO:0035358~regulation of peroxisome proliferator activated receptor signaling pathway	2	0.00947418	0.0197824	ALOX15, SIRT1	114	2	11368	99.7193	1	0.303753	27.9653
GOTERM_BP_DIRECT	GO:0002352~B cell negative selection	2	0.00947418	0.0197824	BAK1, BAX	114	2	11368	99.7193	1	0.303753	27.9653
GOTERM_BP_DIRECT	GO:0010871~negative regulation of receptor biosynthetic process	2	0.00947418	0.0197824	PPARA, PPARG	114	2	11368	99.7193	1	0.303753	27.9653
GOTERM_BP_DIRECT	GO:0007346~regulation of mitotic cell cycle	3	0.0142113	0.0198726	CDKN1A, BIRC5, SIRT1	114	22	11368	13.5981	1	0.301578	28.074
GOTERM_BP_DIRECT	GO:0032868~response to insulin	3	0.0142113	0.0198726	EIF6, MTOR, SIRT1	114	22	11368	13.5981	1	0.301578	28.074
GOTERM_BP_DIRECT	GO:0051973~positive regulation of telomerase activity	3	0.0142113	0.0198726	MAPK1, MAPK3, CTNNB1	114	22	11368	13.5981	1	0.301578	28.074
GOTERM_BP_DIRECT	GO:0060291~long-term synaptic potentiation	3	0.0142113	0.0198726	MAPK1, SNCA, PTEN	114	22	11368	13.5981	1	0.301578	28.074
GOTERM_BP_DIRECT	GO:0060070~canonical Wnt signaling pathway	4	0.0189484	0.0207788	CDC42, MYC, PTEN, CTNNB1	114	59	11368	6.76063	1	0.309677	29.158
GOTERM_BP_DIRECT	GO:0008625~extrinsic apoptotic signaling pathway via death domain receptors	3	0.0142113	0.0216257	TNF, BCL2, BAX	114	23	11368	13.0069	1	0.316767	30.1571
GOTERM_BP_DIRECT	GO:0001974~blood vessel remodeling	3	0.0142113	0.0216257	BAK1, BAX, CCR2	114	23	11368	13.0069	1	0.316767	30.1571
GOTERM_BP_DIRECT	GO:0032212~positive regulation of telomere maintenance via telomerase	3	0.0142113	0.0234405	MAPK1, MAPK3, CTNNB1	114	24	11368	12.4649	1	0.335046	32.2539
GOTERM_BP_DIRECT	GO:0009566~fertilization	3	0.0142113	0.0234405	BAX, DUOX2, BCL2L1	114	24	11368	12.4649	1	0.335046	32.2539
GOTERM_BP_DIRECT	GO:0071407~cellular response to organic cyclic compound	3	0.0142113	0.0234405	CCL2, CYP1A1, TGFB1	114	24	11368	12.4649	1	0.335046	32.2539
GOTERM_BP_DIRECT	GO:0043124~negative regulation of I-kappaB kinase/NF-kappaB signaling	3	0.0142113	0.0253158	ESR1, STAT1, SIRT1	114	25	11368	11.9663	1	0.353116	34.3582
GOTERM_BP_DIRECT	GO:0016049~cell growth	3	0.0142113	0.0253158	BCL2, MTOR, TGFB1	114	25	11368	11.9663	1	0.353116	34.3582
GOTERM_BP_DIRECT	GO:0008217~regulation of blood pressure	3	0.0142113	0.0253158	PTGS2, PTGS1, PPARG	114	25	11368	11.9663	1	0.353116	34.3582
GOTERM_BP_DIRECT	GO:0010628~positive regulation of gene expression	5	0.0236855	0.0260648	CDC42, GJA1, ITGB3, SIRT1, TGFB1	114	113	11368	4.41236	1	0.357963	35.1815
GOTERM_BP_DIRECT	GO:1900103~positive regulation of endoplasmic reticulum unfolded protein response	2	0.00947418	0.0295277	BAK1, BAX	114	3	11368	66.4795	1	0.391487	38.8631
GOTERM_BP_DIRECT	GO:0070849~response to epidermal growth factor	2	0.00947418	0.0295277	MAPK1, MAPK3	114	3	11368	66.4795	1	0.391487	38.8631
GOTERM_BP_DIRECT	GO:1990314~cellular response to insulin-like growth factor stimulus	2	0.00947418	0.0295277	AKT1, RPS6	114	3	11368	66.4795	1	0.391487	38.8631
GOTERM_BP_DIRECT	GO:0032800~receptor biosynthetic process	2	0.00947418	0.0295277	TNF, IL10	114	3	11368	66.4795	1	0.391487	38.8631
GOTERM_BP_DIRECT	GO:0002904~positive regulation of B cell apoptotic process	2	0.00947418	0.0295277	BAX, IL10	114	3	11368	66.4795	1	0.391487	38.8631
GOTERM_BP_DIRECT	GO:0010891~negative regulation of sequestering of triglyceride	2	0.00947418	0.0295277	PPARA, PPARG	114	3	11368	66.4795	1	0.391487	38.8631
GOTERM_BP_DIRECT	GO:0051987~positive regulation of attachment of spindle microtubules to kinetochore	2	0.00947418	0.0295277	CCNB1, SIRT2	114	3	11368	66.4795	1	0.391487	38.8631
GOTERM_BP_DIRECT	GO:0070242~thymocyte apoptotic process	2	0.00947418	0.0295277	BAK1, BAX	114	3	11368	66.4795	1	0.391487	38.8631
GOTERM_BP_DIRECT	GO:0061308~cardiac neural crest cell development involved in heart development	2	0.00947418	0.0295277	MAPK1, MAPK3	114	3	11368	66.4795	1	0.391487	38.8631
GOTERM_BP_DIRECT	GO:0010742~macrophage derived foam cell differentiation	2	0.00947418	0.0295277	PPARG, STAT1	114	3	11368	66.4795	1	0.391487	38.8631
GOTERM_BP_DIRECT	GO:0007623~circadian rhythm	3	0.0142113	0.0312902	NTRK1, MTNR1B, MTNR1A	114	28	11368	10.6842	1	0.405787	40.6607
GOTERM_BP_DIRECT	GO:0001701~in utero embryonic development	5	0.0236855	0.0323997	CCNB1, EDN1, GJA1, BCL2L1, CTNNB1	114	121	11368	4.12063	1	0.413077	41.7666
GOTERM_BP_DIRECT	GO:0050679~positive regulation of epithelial cell proliferation	3	0.0142113	0.0333936	C5AR1, TGFA, MYC	114	29	11368	10.3158	1	0.41901	42.7408
GOTERM_BP_DIRECT	GO:0001503~ossification	3	0.0142113	0.0333936	ALOX15, BCL2, MMP9	114	29	11368	10.3158	1	0.41901	42.7408
GOTERM_BP_DIRECT	GO:0043154~negative regulation of cysteine-type endopeptidase activity involved in apoptotic process	3	0.0142113	0.0333936	SNCA, BIRC5, HGF	114	29	11368	10.3158	1	0.41901	42.7408
GOTERM_BP_DIRECT	GO:0009636~response to toxic substance	3	0.0142113	0.0355507	CYP1A1, BCL2, BAX	114	30	11368	9.97193	1	0.435612	44.803
GOTERM_BP_DIRECT	GO:0071230~cellular response to amino acid stimulus	3	0.0142113	0.0355507	TNF, BCL2L1, MMP2	114	30	11368	9.97193	1	0.435612	44.803
GOTERM_BP_DIRECT	GO:0000165~MAPK cascade	3	0.0142113	0.0377604	CCL2, MYC, TGFB1	114	31	11368	9.65025	1	0.451884	46.8428
GOTERM_BP_DIRECT	GO:0000082~G1/S transition of mitotic cell cycle	3	0.0142113	0.0377604	CCNE2, CCNE1, CDK4	114	31	11368	9.65025	1	0.451884	46.8428
GOTERM_BP_DIRECT	GO:0007044~cell-substrate junction assembly	2	0.00947418	0.0391769	ITGA5, ITGB3	114	4	11368	49.8596	1	0.46054	48.113
GOTERM_BP_DIRECT	GO:0019371~cyclooxygenase pathway	2	0.00947418	0.0391769	PTGS2, PTGS1	114	4	11368	49.8596	1	0.46054	48.113
GOTERM_BP_DIRECT	GO:0045722~positive regulation of gluconeogenesis	2	0.00947418	0.0391769	PPARA, FOXO1	114	4	11368	49.8596	1	0.46054	48.113
GOTERM_BP_DIRECT	GO:0071681~cellular response to indole-3-methanol	2	0.00947418	0.0391769	BRCA1, CTNNB1	114	4	11368	49.8596	1	0.46054	48.113
GOTERM_BP_DIRECT	GO:0048012~hepatocyte growth factor receptor signaling pathway	2	0.00947418	0.0391769	HGF, SIRT2	114	4	11368	49.8596	1	0.46054	48.113
GOTERM_BP_DIRECT	GO:0051574~positive regulation of histone H3-K9 methylation	2	0.00947418	0.0391769	SIRT1, BRCA1	114	4	11368	49.8596	1	0.46054	48.113
GOTERM_BP_DIRECT	GO:1902262~apoptotic process involved in patterning of blood vessels	2	0.00947418	0.0391769	BAK1, BAX	114	4	11368	49.8596	1	0.46054	48.113
GOTERM_BP_DIRECT	GO:0060789~hair follicle placode formation	2	0.00947418	0.0391769	CDC42, CTNNB1	114	4	11368	49.8596	1	0.46054	48.113
GOTERM_BP_DIRECT	GO:2000866~positive regulation of estradiol secretion	2	0.00947418	0.0391769	IL6, TNF	114	4	11368	49.8596	1	0.46054	48.113
GOTERM_BP_DIRECT	GO:0031647~regulation of protein stability	3	0.0142113	0.0446925	CDC42, BCL2, PTEN	114	34	11368	8.79876	1	0.5025	52.7923
GOTERM_BP_DIRECT	GO:0030335~positive regulation of cell migration	4	0.0189484	0.0452696	EDN1, HSPA5, HGF, TGFB1	114	80	11368	4.98596	1	0.50318	53.2584
GOTERM_BP_DIRECT	GO:0006357~regulation of transcription from RNA polymerase II promoter	6	0.0284225	0.0465483	FOS, FOXO1, NFE2L2, STAT1, STAT3, SOD2	114	197	11368	3.03714	1	0.509267	54.2756
GOTERM_BP_DIRECT	GO:0048660~regulation of smooth muscle cell proliferation	2	0.00947418	0.048731	XRCC6, CTNNB1	114	5	11368	39.8877	1	0.521918	55.964
GOTERM_BP_DIRECT	GO:0034351~negative regulation of glial cell apoptotic process	2	0.00947418	0.048731	PRKCA, CCL2	114	5	11368	39.8877	1	0.521918	55.964
GOTERM_BP_DIRECT	GO:0032873~negative regulation of stress-activated MAPK cascade	2	0.00947418	0.048731	FOXO1, MYC	114	5	11368	39.8877	1	0.521918	55.964
GOTERM_BP_DIRECT	GO:0033210~leptin-mediated signaling pathway	2	0.00947418	0.048731	SIRT1, STAT3	114	5	11368	39.8877	1	0.521918	55.964
GOTERM_BP_DIRECT	GO:0010763~positive regulation of fibroblast migration	2	0.00947418	0.048731	ITGB3, TGFB1	114	5	11368	39.8877	1	0.521918	55.964
GOTERM_BP_DIRECT	GO:1900119~positive regulation of execution phase of apoptosis	2	0.00947418	0.048731	TP53, SIRT2	114	5	11368	39.8877	1	0.521918	55.964
GOTERM_BP_DIRECT	GO:0006110~regulation of glycolytic process	2	0.00947418	0.048731	EIF6, PRKAG2	114	5	11368	39.8877	1	0.521918	55.964
GOTERM_BP_DIRECT	GO:0045792~negative regulation of cell size	2	0.00947418	0.048731	MTOR, PTEN	114	5	11368	39.8877	1	0.521918	55.964
GOTERM_BP_DIRECT	GO:0002262~myeloid cell homeostasis	2	0.00947418	0.048731	BAK1, BAX	114	5	11368	39.8877	1	0.521918	55.964
GOTERM_BP_DIRECT	GO:2000573~positive regulation of DNA biosynthetic process	2	0.00947418	0.048731	HGF, MYC	114	5	11368	39.8877	1	0.521918	55.964
GOTERM_BP_DIRECT	GO:0051591~response to cAMP	2	0.00947418	0.048731	DUOX2, STAT1	114	5	11368	39.8877	1	0.521918	55.964
GOTERM_BP_DIRECT	GO:0060068~vagina development	2	0.00947418	0.048731	BAK1, BAX	114	5	11368	39.8877	1	0.521918	55.964
GOTERM_BP_DIRECT	GO:0048011~neurotrophin TRK receptor signaling pathway	2	0.00947418	0.048731	CASP3, NTRK1	114	5	11368	39.8877	1	0.521918	55.964
GOTERM_BP_DIRECT	GO:0033211~adiponectin-activated signaling pathway	2	0.00947418	0.048731	ADIPOR2, ADIPOR1	114	5	11368	39.8877	1	0.521918	55.964
GOTERM_BP_DIRECT	GO:0035234~ectopic germ cell programmed cell death	2	0.00947418	0.048731	BAX, IL1A	114	5	11368	39.8877	1	0.521918	55.964
GOTERM_BP_DIRECT	GO:0033129~positive regulation of histone phosphorylation	2	0.00947418	0.048731	CCNB1, MAPK3	114	5	11368	39.8877	1	0.521918	55.964
GOTERM_BP_DIRECT	GO:0045348~positive regulation of MHC class II biosynthetic process	2	0.00947418	0.048731	SIRT1, IL10	114	5	11368	39.8877	1	0.521918	55.964
GOTERM_BP_DIRECT	GO:0002740~negative regulation of cytokine secretion involved in immune response	2	0.00947418	0.048731	TNF, IL10	114	5	11368	39.8877	1	0.521918	55.964
GOTERM_BP_DIRECT	GO:1904659~glucose transmembrane transport	2	0.00947418	0.048731	SLC2A4, SLC2A1	114	5	11368	39.8877	1	0.521918	55.964
GOTERM_BP_DIRECT	GO:2001020~regulation of response to DNA damage stimulus	2	0.00947418	0.048731	CASP9, MCL1	114	5	11368	39.8877	1	0.521918	55.964
GOTERM_BP_DIRECT	GO:0000187~activation of MAPK activity	3	0.0142113	0.0495543	TNF, TGFA, HGF	114	36	11368	8.30994	1	0.524168	56.5856
GOTERM_BP_DIRECT	GO:0009267~cellular response to starvation	3	0.0142113	0.0495543	ALB, FOXO1, SIRT1	114	36	11368	8.30994	1	0.524168	56.5856
GOTERM_BP_DIRECT	GO:0001938~positive regulation of endothelial cell proliferation	3	0.0142113	0.0520539	PRKCA, VEGFA, SIRT1	114	37	11368	8.08535	1	0.53831	58.4225
GOTERM_BP_DIRECT	GO:0009615~response to virus	3	0.0142113	0.0520539	TNF, CREBZF, DUOX2	114	37	11368	8.08535	1	0.53831	58.4225
GOTERM_BP_DIRECT	GO:0050665~hydrogen peroxide biosynthetic process	2	0.00947418	0.058191	CYP1A1, DUOX2	114	6	11368	33.2398	1	0.575838	62.6277
GOTERM_BP_DIRECT	GO:1904145~negative regulation of meiotic cell cycle process involved in oocyte maturation	2	0.00947418	0.058191	CCNB1, PRKACA	114	6	11368	33.2398	1	0.575838	62.6277
GOTERM_BP_DIRECT	GO:0050872~white fat cell differentiation	2	0.00947418	0.058191	PPARG, SIRT1	114	6	11368	33.2398	1	0.575838	62.6277
GOTERM_BP_DIRECT	GO:0048678~response to axon injury	2	0.00947418	0.058191	BAX, SOD2	114	6	11368	33.2398	1	0.575838	62.6277
GOTERM_BP_DIRECT	GO:0034983~peptidyl-lysine deacetylation	2	0.00947418	0.058191	SIRT1, SIRT2	114	6	11368	33.2398	1	0.575838	62.6277
GOTERM_BP_DIRECT	GO:0042473~outer ear morphogenesis	2	0.00947418	0.058191	MAPK1, MAPK3	114	6	11368	33.2398	1	0.575838	62.6277
GOTERM_BP_DIRECT	GO:0051090~regulation of sequence-specific DNA binding transcription factor activity	2	0.00947418	0.058191	CREBZF, MAPK3	114	6	11368	33.2398	1	0.575838	62.6277
GOTERM_BP_DIRECT	GO:0097194~execution phase of apoptosis	2	0.00947418	0.058191	CFLAR, CASP3	114	6	11368	33.2398	1	0.575838	62.6277
GOTERM_BP_DIRECT	GO:0048599~oocyte development	2	0.00947418	0.058191	BCL2, CTNNB1	114	6	11368	33.2398	1	0.575838	62.6277
GOTERM_BP_DIRECT	GO:0043161~proteasome-mediated ubiquitin-dependent protein catabolic process	4	0.0189484	0.0587442	NFE2L2, SIRT1, DDIT3, SIRT2	114	89	11368	4.48177	1	0.575577	62.9865
GOTERM_BP_DIRECT	GO:0030593~neutrophil chemotaxis	3	0.0142113	0.0598139	CCL2, C5AR1, CXCL8	114	40	11368	7.47895	1	0.578577	63.671
GOTERM_BP_DIRECT	GO:0016567~protein ubiquitination	4	0.0189484	0.0619684	CDC42, BIRC5, NFE2L2, SIRT1	114	91	11368	4.38327	1	0.588159	65.0139
GOTERM_BP_DIRECT	GO:0001934~positive regulation of protein phosphorylation	3	0.0142113	0.0624839	MMP9, VEGFA, TGFB1	114	41	11368	7.29653	1	0.587576	65.3282
GOTERM_BP_DIRECT	GO:0001525~angiogenesis	4	0.0189484	0.0669565	VEGFA, TGFA, PTEN, SIRT1	114	94	11368	4.24337	1	0.610088	67.946
GOTERM_BP_DIRECT	GO:1902176~negative regulation of oxidative stress-induced intrinsic apoptotic signaling pathway	2	0.00947418	0.0675577	NFE2L2, SIRT1	114	7	11368	28.4912	1	0.609833	68.2834
GOTERM_BP_DIRECT	GO:0001955~blood vessel maturation	2	0.00947418	0.0675577	MMP2, DDIT3	114	7	11368	28.4912	1	0.609833	68.2834
GOTERM_BP_DIRECT	GO:0032461~positive regulation of protein oligomerization	2	0.00947418	0.0675577	BAX, TP53	114	7	11368	28.4912	1	0.609833	68.2834
GOTERM_BP_DIRECT	GO:0045861~negative regulation of proteolysis	2	0.00947418	0.0675577	PLAT, NR1H3	114	7	11368	28.4912	1	0.609833	68.2834
GOTERM_BP_DIRECT	GO:0010759~positive regulation of macrophage chemotaxis	2	0.00947418	0.0675577	CCL2, C5AR1	114	7	11368	28.4912	1	0.609833	68.2834
GOTERM_BP_DIRECT	GO:0032471~negative regulation of endoplasmic reticulum calcium ion concentration	2	0.00947418	0.0675577	BAK1, BAX	114	7	11368	28.4912	1	0.609833	68.2834
GOTERM_BP_DIRECT	GO:0008283~cell proliferation	4	0.0189484	0.0703811	BAK1, CDK1, BCL2L1, STAT3	114	96	11368	4.15497	1	0.62181	69.8238
GOTERM_BP_DIRECT	GO:0030198~extracellular matrix organization	3	0.0142113	0.0764127	APP, TNF, MMP9	114	46	11368	6.50343	1	0.649643	72.8822
GOTERM_BP_DIRECT	GO:0007160~cell-matrix adhesion	3	0.0142113	0.0764127	BCAM, ITGB3, CTNNB1	114	46	11368	6.50343	1	0.649643	72.8822
GOTERM_BP_DIRECT	GO:0035067~negative regulation of histone acetylation	2	0.00947418	0.076832	SNCA, BRCA1	114	8	11368	24.9298	1	0.648186	73.0836
GOTERM_BP_DIRECT	GO:0008631~intrinsic apoptotic signaling pathway in response to oxidative stress	2	0.00947418	0.076832	BCL2, SOD2	114	8	11368	24.9298	1	0.648186	73.0836
GOTERM_BP_DIRECT	GO:0017144~drug metabolic process	2	0.00947418	0.076832	CBR1, CYP1A1	114	8	11368	24.9298	1	0.648186	73.0836
GOTERM_BP_DIRECT	GO:0030278~regulation of ossification	2	0.00947418	0.076832	MAPK1, MAPK3	114	8	11368	24.9298	1	0.648186	73.0836
GOTERM_BP_DIRECT	GO:0060736~prostate gland growth	2	0.00947418	0.076832	PTEN, CYP19A1	114	8	11368	24.9298	1	0.648186	73.0836
GOTERM_BP_DIRECT	GO:0060020~Bergmann glial cell differentiation	2	0.00947418	0.076832	MAPK1, MAPK3	114	8	11368	24.9298	1	0.648186	73.0836
GOTERM_BP_DIRECT	GO:0015758~glucose transport	2	0.00947418	0.076832	EDN1, SLC2A1	114	8	11368	24.9298	1	0.648186	73.0836
GOTERM_BP_DIRECT	GO:0010248~establishment or maintenance of transmembrane electrochemical gradient	2	0.00947418	0.076832	BAK1, BAX	114	8	11368	24.9298	1	0.648186	73.0836
GOTERM_BP_DIRECT	GO:0043536~positive regulation of blood vessel endothelial cell migration	2	0.00947418	0.076832	PRKCA, TGFB1	114	8	11368	24.9298	1	0.648186	73.0836
GOTERM_BP_DIRECT	GO:0043330~response to exogenous dsRNA	3	0.0142113	0.079307	MAPK1, MAPK3, NFKBIA	114	47	11368	6.36506	1	0.656803	74.2442
GOTERM_BP_DIRECT	GO:0009791~post-embryonic development	3	0.0142113	0.079307	BCL2, MTOR, SOD2	114	47	11368	6.36506	1	0.656803	74.2442
GOTERM_BP_DIRECT	GO:0050728~negative regulation of inflammatory response	3	0.0142113	0.0822353	PPARA, HGF, NR1H3	114	48	11368	6.23246	1	0.667197	75.5565
GOTERM_BP_DIRECT	GO:0045454~cell redox homeostasis	3	0.0142113	0.0822353	PTGES2, NFE2L2, DDIT3	114	48	11368	6.23246	1	0.667197	75.5565
GOTERM_BP_DIRECT	GO:0070555~response to interleukin-1	2	0.00947418	0.0860149	PRKCA, SNCA	114	9	11368	22.1598	1	0.680927	77.1577
GOTERM_BP_DIRECT	GO:0060425~lung morphogenesis	2	0.00947418	0.0860149	MAPK1, MAPK3	114	9	11368	22.1598	1	0.680927	77.1577
GOTERM_BP_DIRECT	GO:0044130~negative regulation of growth of symbiont in host	2	0.00947418	0.0860149	TNF, IL10	114	9	11368	22.1598	1	0.680927	77.1577
GOTERM_BP_DIRECT	GO:0036120~cellular response to platelet-derived growth factor stimulus	2	0.00947418	0.0860149	GJA1, ITGB3	114	9	11368	22.1598	1	0.680927	77.1577
GOTERM_BP_DIRECT	GO:0019229~regulation of vasoconstriction	2	0.00947418	0.0951073	AGTR1, EDN1	114	10	11368	19.9439	1	0.715654	80.6154
GOTERM_BP_DIRECT	GO:0051482~positive regulation of cytosolic calcium ion concentration involved in phospholipase C-activating G-protein coupled signaling pathway	2	0.00947418	0.0951073	AGTR1, EDN1	114	10	11368	19.9439	1	0.715654	80.6154
GOTERM_BP_DIRECT	GO:0031334~positive regulation of protein complex assembly	2	0.00947418	0.0951073	VEGFA, TGFB1	114	10	11368	19.9439	1	0.715654	80.6154
GOTERM_BP_DIRECT	GO:0030574~collagen catabolic process	2	0.00947418	0.0951073	MMP9, MMP2	114	10	11368	19.9439	1	0.715654	80.6154
GOTERM_BP_DIRECT	GO:0001764~neuron migration	3	0.0142113	0.0973531	BAX, GJA1, CTNNB1	114	53	11368	5.64449	1	0.72113	81.3902
GOTERM_BP_DIRECT	GO:0060326~cell chemotaxis	3	0.0142113	0.0973531	AGTR1, C5AR1, HGF	114	53	11368	5.64449	1	0.72113	81.3902

## Sheet: CC
Category	Term	Count	%	PValue	Genes	List Total	Pop Hits	Pop Total	Fold Enrichment	Bonferroni	Benjamini	FDR
GOTERM_CC_DIRECT	GO:0005829~cytosol	28	0.132639	1.94566e-10	EIF6, XDH, PTGES2, MCL1, SNCA, GJA1, NFKBIA, BCL2L1, CTNNB1, FOS, CDC42, BAK1, CASP3, BCL2, IL1A, PRKCA, RELA, TP53, BIRC5, CDK4, SIRT2, MAPK1, ALOX15, BAX, MAPK3, MTOR, ALOX5, NFE2L2	118	718	12833	4.24111	3.94969e-08	3.94969e-08	2.44463e-07
GOTERM_CC_DIRECT	GO:0005634~nucleus	42	0.198958	5.95002e-07	PPARA, PTGES2, MCL1, PPARG, SNCA, NFKBIA, GJA1, FOXO1, TGFB1, CTNNB1, AKT1, CCNE2, FOS, CASP3, CASP9, ALB, MYC, NR1H3, SREBF1, YARS, HSP90AA1, CREBZF, RELA, ESR1, RUNX1T1, TP53, BIRC5, CDK4, STAT1, RPS6, SIRT1, BRCA1, SIRT2, AHR, STAT3, CCNB1, CDKN1A, NR1I2, CCND2, EIF2S1, NFE2L2, MTOR	118	2096	12833	2.17924	0.000120778	6.03909e-05	0.000747589
GOTERM_CC_DIRECT	GO:0005615~extracellular space	23	0.108953	1.23012e-06	XDH, PLAT, IL6, TNF, CCL2, MMP9, PRKAG2, SNCA, EDN1, CXCL8, SPARC, HGF, MMP2, TGFB1, IL10, TTR, APP, TNFSF10, ALB, VEGFA, TGFA, ALOX5, IL1A	118	762	12833	3.28261	0.000249684	8.3235e-05	0.00154558
GOTERM_CC_DIRECT	GO:0005741~mitochondrial outer membrane	7	0.0331596	1.25409e-05	BAK1, MCL1, BCL2, BAX, MAOB, BCL2A1, BCL2L1	118	57	12833	13.3558	0.00254258	0.000636251	0.0157559
GOTERM_CC_DIRECT	GO:0045177~apical part of cell	5	0.0236855	0.000381305	PLAT, CDC42, APP, C5AR1, CTNNB1	118	38	12833	14.3098	0.0744987	0.0153647	0.478037
GOTERM_CC_DIRECT	GO:0005737~cytoplasm	35	0.165798	0.000586319	EDN1, SNCA, NFKBIA, GJA1, FOXO1, BCL2L1, PTEN, TGFB1, CTNNB1, AKT1, CASP3, APP, CBR1, CASP9, PRKACA, NQO1, SREBF1, CFLAR, YARS, HSP90AA1, RELA, TP53, BIRC5, CDK7, CDK4, STAT1, RPS6, SIRT1, DDIT3, BRCA1, STAT3, CCNB1, CCND2, EIF2S1, NFE2L2	118	2145	12833	1.77454	0.112243	0.0196474	0.73419
GOTERM_CC_DIRECT	GO:0042585~germinal vesicle	3	0.0142113	0.00167975	CDK1, PRKACA, CDK7	118	7	12833	46.609	0.289137	0.0475844	2.09015
GOTERM_CC_DIRECT	GO:0030496~midbody	5	0.0236855	0.00306129	CDK1, CDC42, BIRC5, HSPA5, SIRT2	118	66	12833	8.23896	0.463342	0.0748499	3.779
GOTERM_CC_DIRECT	GO:0032993~protein-DNA complex	3	0.0142113	0.00909766	NFE2L2, DDIT3, CTNNB1	118	16	12833	20.3914	0.843591	0.186282	10.8483
GOTERM_CC_DIRECT	GO:0005911~cell-cell junction	5	0.0236855	0.0118706	CDC42, APP, ITGA5, GJA1, CTNNB1	118	97	12833	5.60589	0.911446	0.215269	13.9327
GOTERM_CC_DIRECT	GO:0016020~membrane	14	0.0663193	0.0121466	CDK1, XRCC6, SNCA, HGF, CCNB1, CDC42, ALOX15, TNFSF10, CCND2, EIF2S1, VEGFA, KHSRP, JAK1, CYP19A1	118	707	12833	2.15355	0.916328	0.201909	14.2343
GOTERM_CC_DIRECT	GO:0090575~RNA polymerase II transcription factor complex	3	0.0142113	0.0140671	PPARG, STAT3, NR1H3	118	20	12833	16.3131	0.943634	0.213103	16.3059
GOTERM_CC_DIRECT	GO:0097136~Bcl-2 family protein complex	2	0.00947418	0.0181518	MCL1, BCL2L1	118	2	12833	108.754	0.975734	0.248776	20.5597
GOTERM_CC_DIRECT	GO:0043209~myelin sheath	5	0.0236855	0.0209245	CDC42, ALB, BCL2, HSPA5, SOD2	118	115	12833	4.72845	0.986333	0.264074	23.3328
GOTERM_CC_DIRECT	GO:0072686~mitotic spindle	3	0.0142113	0.0215646	CDK1, CDC42, SIRT2	118	25	12833	13.0505	0.988032	0.255494	23.9602
GOTERM_CC_DIRECT	GO:0005667~transcription factor complex	5	0.0236855	0.0260113	FOS, XRCC6, TP53, CDK4, CTNNB1	118	123	12833	4.4209	0.995253	0.284223	28.1899
GOTERM_CC_DIRECT	GO:0043293~apoptosome	2	0.00947418	0.0271048	CASP9, APAF1	118	3	12833	72.5028	0.996221	0.279731	29.1964
GOTERM_CC_DIRECT	GO:0070062~extracellular exosome	23	0.108953	0.0291378	PRKCA, PLAT, CDK1, MMP9, MAOB, DUOX2, PTGS1, GJA1, BCAM, CTNNB1, CDC42, MAPK1, TTR, CBR1, APP, TNFSF10, ALB, BAX, EIF2S1, MAPK3, PRKACA, HSPA5, NQO1	118	1590	12833	1.57317	0.997528	0.283583	31.033
GOTERM_CC_DIRECT	GO:0005759~mitochondrial matrix	4	0.0189484	0.0388985	MCL1, TP53, BCL2L1, SOD2	118	82	12833	5.30508	0.999682	0.34551	39.2559
GOTERM_CC_DIRECT	GO:0046930~pore complex	2	0.00947418	0.0447688	BAK1, BCL2	118	5	12833	43.5017	0.999908	0.371795	43.7564
GOTERM_CC_DIRECT	GO:0005916~fascia adherens	2	0.00947418	0.0447688	GJA1, CTNNB1	118	5	12833	43.5017	0.999908	0.371795	43.7564
GOTERM_CC_DIRECT	GO:0005783~endoplasmic reticulum	8	0.0378967	0.0476443	PRKCA, BAK1, FOS, ITGA5, ALB, TP53, GJA1, CYP19A1	118	362	12833	2.40341	0.99995	0.376181	45.8471
GOTERM_CC_DIRECT	GO:0042470~melanosome	3	0.0142113	0.0490642	HSP90AA1, SLC2A1, HSPA5	118	39	12833	8.36571	0.999963	0.37137	46.8528
GOTERM_CC_DIRECT	GO:0005739~mitochondrion	12	0.0568451	0.0521479	PRKCA, MAPK1, PTGES2, BBC3, SNCA, TP53, GJA1, PRKACA, CDK7, MMP2, SIRT1, BCL2L11	118	695	12833	1.87777	0.999981	0.376681	48.9781
GOTERM_CC_DIRECT	GO:0005641~nuclear envelope lumen	2	0.00947418	0.0534811	APP, ALOX5	118	6	12833	36.2514	0.999986	0.371806	49.8725
GOTERM_CC_DIRECT	GO:0016605~PML body	3	0.0142113	0.0536654	TP53, MTOR, SIRT1	118	41	12833	7.95763	0.999986	0.361026	49.995
GOTERM_CC_DIRECT	GO:0031965~nuclear membrane	4	0.0189484	0.0559084	BCL2, BCL2L1, ALOX5, CDK4	118	95	12833	4.57913	0.999992	0.361857	51.4639
GOTERM_CC_DIRECT	GO:0030054~cell junction	4	0.0189484	0.0587934	DUOX2, SNCA, BCL2L1, CTNNB1	118	97	12833	4.48471	0.999995	0.365912	53.2949
GOTERM_CC_DIRECT	GO:0051233~spindle midzone	2	0.00947418	0.0706702	CDC42, APP	118	8	12833	27.1886	1	0.412197	60.1829
GOTERM_CC_DIRECT	GO:0043220~Schmidt-Lanterman incisure	2	0.00947418	0.0706702	PTEN, SIRT2	118	8	12833	27.1886	1	0.412197	60.1829
GOTERM_CC_DIRECT	GO:0005813~centrosome	6	0.0284225	0.0733952	CCNB1, CDK1, PRKACA, NFE2L2, BCL2L1, CTNNB1	118	245	12833	2.66337	1	0.413508	61.6252
GOTERM_CC_DIRECT	GO:0000785~chromatin	3	0.0142113	0.081414	TP53, NFE2L2, CDK4	118	52	12833	6.27428	1	0.437083	65.5953
GOTERM_CC_DIRECT	GO:0048471~perinuclear region of cytoplasm	6	0.0284225	0.0848367	APP, SLC2A4, SNCA, RPS6, SIRT2, CTNNB1	118	256	12833	2.54893	1	0.4404	67.1717
GOTERM_CC_DIRECT	GO:0009986~cell surface	6	0.0284225	0.0859213	PLAT, APP, NTRK1, BCAM, HSPA5, TGFB1	118	257	12833	2.53901	1	0.434426	67.6572
GOTERM_CC_DIRECT	GO:0031143~pseudopodium	2	0.00947418	0.0875497	MAPK1, MAPK3	118	10	12833	21.7508	1	0.43085	68.3737
GOTERM_CC_DIRECT	GO:0016324~apical plasma membrane	4	0.0189484	0.0948749	DUOX2, GJA1, ITGB3, PTEN	118	119	12833	3.6556	1	0.448526	71.4198

## Sheet: MF
Category	Term	Count	%	PValue	Genes	List Total	Pop Hits	Pop Total	Fold Enrichment	Bonferroni	Benjamini	FDR
GOTERM_MF_DIRECT	GO:0042802~identical protein binding	9	0.0426338	3.0633e-09	TTR, CDC42, TNF, SNCA, PPARG, TP53, NFKBIA, ITGB3, STAT3	112	38	11048	23.3628	7.41318e-07	7.41318e-07	3.95915e-06
GOTERM_MF_DIRECT	GO:0046982~protein heterodimerization activity	8	0.0378967	1.00774e-07	AGTR1, BAK1, MCL1, BCL2, BAX, BCL2A1, TP53, BCL2L1	112	39	11048	20.2344	2.43869e-05	1.21935e-05	0.000130244
GOTERM_MF_DIRECT	GO:0003700~transcription factor activity, sequence-specific DNA binding	15	0.0710564	5.3336e-05	CREBZF, RELA, PPARG, ESR1, TP53, RUNX1T1, FOXO1, AHR, STAT3, CTNNB1, FOS, NR1I2, NFE2L2, MYC, NR1H3	112	406	11048	3.64444	0.0128247	0.00429331	0.068912
GOTERM_MF_DIRECT	GO:0042803~protein homodimerization activity	7	0.0331596	6.98288e-05	BAK1, MCL1, BCL2, BAX, BCL2A1, BIRC5, BCL2L1	112	70	11048	9.86429	0.0167572	0.00421588	0.0902125
GOTERM_MF_DIRECT	GO:0003677~DNA binding	16	0.0757935	7.01529e-05	SREBF1, PPARA, PTGES2, RELA, PPARG, ESR1, TP53, STAT1, AHR, BRCA1, STAT3, APP, ALB, NFE2L2, MYC, NR1H3	112	471	11048	3.35093	0.0168343	0.00338976	0.090631
GOTERM_MF_DIRECT	GO:0015267~channel activity	3	0.0142113	0.000592391	BCL2, BAX, BCL2A1	112	4	11048	73.9821	0.133593	0.0236168	0.762935
GOTERM_MF_DIRECT	GO:0004879~RNA polymerase II transcription factor activity, ligand-activated sequence-specific DNA binding	4	0.0189484	0.00115061	PPARA, PPARG, STAT3, NR1H3	112	21	11048	18.7891	0.243164	0.0390196	1.47695
GOTERM_MF_DIRECT	GO:0043565~sequence-specific DNA binding	10	0.0473709	0.00168851	FOS, PPARA, NR1I2, CREBZF, BCL2, PPARG, ESR1, TP53, FOXO1, NR1H3	112	273	11048	3.61329	0.335663	0.049836	2.16048
GOTERM_MF_DIRECT	GO:0005524~ATP binding	21	0.0994789	0.0019173	PRKCA, CDK1, YARS, HSP90AA1, PRKAG2, TP53, CDK7, CDK4, AKT1, IGF1R, MAPK1, CSNK2A1, NTRK1, MAPK3, ABCC3, JAK1, PRKACA, MAPK8, HSPA5, MTOR, APAF1	112	992	11048	2.08821	0.371509	0.0502948	2.44988
GOTERM_MF_DIRECT	GO:0004693~cyclin-dependent protein serine/threonine kinase activity	3	0.0142113	0.00203281	CDK1, CDK7, CDK4	112	7	11048	42.2755	0.388867	0.0480512	2.59569
GOTERM_MF_DIRECT	GO:0044212~transcription regulatory region DNA binding	6	0.0284225	0.00229836	TNF, XRCC6, PPARG, TP53, BRCA1, CTNNB1	112	92	11048	6.43323	0.426984	0.0493621	2.93013
GOTERM_MF_DIRECT	GO:0004707~MAP kinase activity	3	0.0142113	0.00343931	MAPK1, MAPK3, MAPK8	112	9	11048	32.881	0.565581	0.0671202	4.3551
GOTERM_MF_DIRECT	GO:0043022~ribosome binding	4	0.0189484	0.00432496	EIF6, EIF2S1, HSPA5, MTOR	112	33	11048	11.9567	0.649681	0.0775161	5.44788
GOTERM_MF_DIRECT	GO:0008353~RNA polymerase II carboxy-terminal domain kinase activity	3	0.0142113	0.00618252	CDK1, MAPK1, CDK7	112	12	11048	24.6607	0.777052	0.101655	7.70257
GOTERM_MF_DIRECT	GO:0004601~peroxidase activity	3	0.0142113	0.00618252	PTGS2, PTGS1, DUOX2	112	12	11048	24.6607	0.777052	0.101655	7.70257
GOTERM_MF_DIRECT	GO:0046983~protein dimerization activity	3	0.0142113	0.0084135	SREBF1, MYC, STAT3	112	14	11048	21.1378	0.870578	0.12743	10.3449
GOTERM_MF_DIRECT	GO:0008083~growth factor activity	4	0.0189484	0.0137382	IL6, VEGFA, TGFA, TGFB1	112	50	11048	7.89143	0.964834	0.188792	16.3718
GOTERM_MF_DIRECT	GO:0003707~steroid hormone receptor activity	4	0.0189484	0.014492	PPARA, NR1I2, PPARG, NR1H3	112	51	11048	7.73669	0.970775	0.187636	17.1942
GOTERM_MF_DIRECT	GO:0001046~core promoter sequence-specific DNA binding	3	0.0142113	0.018549	PPARG, TP53, SIRT1	112	21	11048	14.0918	0.98923	0.22254	21.4934
GOTERM_MF_DIRECT	GO:0097003~adipokinetic hormone receptor activity	2	0.00947418	0.0199941	ADIPOR2, ADIPOR1	112	2	11048	98.6429	0.99246	0.226819	22.9743
GOTERM_MF_DIRECT	GO:0097200~cysteine-type endopeptidase activity involved in execution phase of apoptosis	2	0.00947418	0.0199941	CFLAR, CASP3	112	2	11048	98.6429	0.99246	0.226819	22.9743
GOTERM_MF_DIRECT	GO:0020037~heme binding	5	0.0236855	0.0219233	CYP1A1, PTGS2, PTGS1, DUOX2, CYP19A1	112	106	11048	4.65296	0.99532	0.235263	24.9112
GOTERM_MF_DIRECT	GO:0005506~iron ion binding	5	0.0236855	0.0269532	XDH, ALOX15, CYP1A1, ALOX5, CYP19A1	112	113	11048	4.36473	0.998656	0.270114	29.7519
GOTERM_MF_DIRECT	GO:0004666~prostaglandin-endoperoxide synthase activity	2	0.00947418	0.0298421	PTGS2, PTGS1	112	3	11048	65.7619	0.999346	0.283416	32.4002
GOTERM_MF_DIRECT	GO:0008502~melatonin receptor activity	2	0.00947418	0.0298421	MTNR1B, MTNR1A	112	3	11048	65.7619	0.999346	0.283416	32.4002
GOTERM_MF_DIRECT	GO:0005125~cytokine activity	5	0.0236855	0.0309363	IL6, TNF, TGFB1, IL1A, IL10	112	118	11048	4.17978	0.999502	0.28154	33.379
GOTERM_MF_DIRECT	GO:0008144~drug binding	3	0.0142113	0.0340485	PPARA, ALB, PPARG	112	29	11048	10.2044	0.999771	0.294821	36.0919
GOTERM_MF_DIRECT	GO:0043621~protein self-association	2	0.00947418	0.0395919	SLC2A1, TP53	112	4	11048	49.3214	0.999943	0.323649	40.6733
GOTERM_MF_DIRECT	GO:0046965~retinoid X receptor binding	2	0.00947418	0.0395919	PPARG, NR1H3	112	4	11048	49.3214	0.999943	0.323649	40.6733
GOTERM_MF_DIRECT	GO:0035173~histone kinase activity	2	0.00947418	0.0395919	CCNB1, CDK1	112	4	11048	49.3214	0.999943	0.323649	40.6733
GOTERM_MF_DIRECT	GO:0001948~glycoprotein binding	3	0.0142113	0.048005	TGFA, HSPA5, TGFB1	112	35	11048	8.4551	0.999993	0.367387	47.0502
GOTERM_MF_DIRECT	GO:0019903~protein phosphatase binding	2	0.00947418	0.0492447	STAT3, CTNNB1	112	5	11048	39.4571	0.999995	0.364038	47.9345
GOTERM_MF_DIRECT	GO:0042562~hormone binding	2	0.00947418	0.0588014	ADIPOR2, ADIPOR1	112	6	11048	32.881	1	0.407714	54.3075
GOTERM_MF_DIRECT	GO:0070330~aromatase activity	2	0.00947418	0.0588014	CYP1A1, CYP19A1	112	6	11048	32.881	1	0.407714	54.3075
GOTERM_MF_DIRECT	GO:0051721~protein phosphatase 2A binding	2	0.00947418	0.0588014	TP53, FOXO1	112	6	11048	32.881	1	0.407714	54.3075
GOTERM_MF_DIRECT	GO:0004871~signal transducer activity	4	0.0189484	0.0721549	GJA1, STAT1, STAT3, CTNNB1	112	96	11048	4.11012	1	0.464711	62.0127
GOTERM_MF_DIRECT	GO:0005507~copper ion binding	3	0.0142113	0.0749179	SNCA, TP53, IL1A	112	45	11048	6.57619	1	0.466435	63.4491
GOTERM_MF_DIRECT	GO:0036094~small molecule binding	2	0.00947418	0.0776299	TTR, ALB	112	8	11048	24.6607	1	0.46785	64.8101
GOTERM_MF_DIRECT	GO:0003684~damaged DNA binding	3	0.0142113	0.0778254	XRCC6, TP53, BRCA1	112	46	11048	6.43323	1	0.458125	64.9064
GOTERM_MF_DIRECT	GO:0016538~cyclin-dependent protein serine/threonine kinase regulator activity	2	0.00947418	0.0869038	CCNE2, CCNE1	112	9	11048	21.9206	1	0.486601	69.1186

## Sheet: KEGG
Category	Term	Count	%	PValue	Genes	List Total	Pop Hits	Pop Total	Fold Enrichment	Bonferroni	Benjamini	FDR
KEGG_PATHWAY	ssc05200:Pathways in cancer	48	0.22738	4.55746e-31	PTGS2, MMP9, PPARG, FOXO1, NFKBIA, CXCL8, BCL2L1, PTEN, MMP2, TGFB1, CTNNB1, CCNE2, AKT1, IGF1R, CDC42, FOS, CCNE1, AGTR1, CASP3, CASP9, BCL2, SLC2A1, TGFA, PRKACA, MYC, PRKCA, IL6, HSP90AA1, RELA, RUNX1T1, TP53, BIRC5, HGF, BIRC3, STAT1, CDK4, STAT3, PRKCB, MAPK1, CDKN1A, CCND1, BAX, NTRK1, VEGFA, MAPK3, JAK1, MAPK8, MTOR	111	384	7001	7.88401	8.88705e-29	8.88705e-29	5.68862e-28
KEGG_PATHWAY	ssc05161:Hepatitis B	31	0.14685	1.02465e-25	TNF, MMP9, NFKBIA, CXCL8, PTEN, TGFB1, AKT1, CCNE2, FOS, CCNE1, CASP3, CASP9, BCL2, MYC, PRKCA, IL6, RELA, TP53, BIRC5, CDK4, STAT1, STAT3, PRKCB, MAPK1, CCND1, CDKN1A, BAX, MAPK3, JAK1, MAPK8, APAF1	111	151	7001	12.9486	1.99807e-23	9.99034e-24	1.27897e-22
KEGG_PATHWAY	ssc05205:Proteoglycans in cancer	26	0.123164	6.49564e-17	TNF, MMP9, ITGB3, MMP2, TGFB1, CTNNB1, AKT1, IGF1R, CDC42, CASP3, PRKACA, MYC, PRKCA, TP53, ESR1, HGF, RPS6, STAT3, PRKCB, MAPK1, CCND1, CDKN1A, ITGA5, VEGFA, MAPK3, MTOR	111	190	7001	8.63092	2.16493e-14	7.21645e-15	1.33227e-13
KEGG_PATHWAY	ssc05215:Prostate cancer	19	0.0900047	3.94938e-16	HSP90AA1, RELA, TP53, FOXO1, NFKBIA, PTEN, CTNNB1, CCNE2, AKT1, IGF1R, CCNE1, MAPK1, CDKN1A, CCND1, CASP9, BCL2, MAPK3, TGFA, MTOR	111	85	7001	14.0985	8.65974e-14	2.16493e-14	5.55112e-13
KEGG_PATHWAY	ssc05212:Pancreatic cancer	17	0.0805306	8.62787e-16	RELA, TP53, BCL2L1, STAT1, CDK4, TGFB1, STAT3, AKT1, CDC42, MAPK1, CCND1, CASP9, VEGFA, MAPK3, TGFA, JAK1, MAPK8	111	63	7001	17.0194	1.73195e-13	3.4639e-14	1.11022e-12
KEGG_PATHWAY	ssc04068:FoxO signaling pathway	21	0.0994789	9.24262e-15	IL6, PRKAG2, FOXO1, PTEN, SIRT1, TGFB1, IL10, STAT3, BCL2L11, SOD2, AKT1, CCNB1, IGF1R, MAPK1, CDKN1A, CCND1, TNFSF10, SLC2A4, CCND2, MAPK3, MAPK8	111	133	7001	9.95875	1.7969e-12	2.99538e-13	1.15019e-11
KEGG_PATHWAY	ssc04151:PI3K-Akt signaling pathway	29	0.137376	5.54971e-14	MCL1, ITGB3, BCL2L1, PTEN, AKT1, CCNE2, CCNE1, IGF1R, CASP9, BCL2, MYC, IL6, HSP90AA1, RELA, TP53, HGF, CDK4, RPS6, BCL2L11, BRCA1, MAPK1, CCND1, CDKN1A, ITGA5, CCND2, VEGFA, MAPK3, JAK1, MTOR	111	326	7001	5.61071	1.08247e-11	1.54643e-12	6.9289e-11
KEGG_PATHWAY	ssc05162:Measles	20	0.0947418	1.05344e-13	IL6, RELA, TP53, NFKBIA, STAT1, CDK4, STAT3, CCNE2, AKT1, CCNE1, CCND1, TNFSF10, CSNK2A1, BBC3, CCND2, EIF2S1, JAK1, IL1A, CD28	111	132	7001	9.55637	2.05452e-11	2.56817e-12	1.31506e-10
KEGG_PATHWAY	ssc04115:p53 signaling pathway	16	0.0757935	1.82122e-13	CDK1, TP53, PMAIP1, CDK4, PTEN, CCNE2, CCNB1, CCNE1, CASP3, CCND1, CDKN1A, CASP9, CCND2, BBC3, BAX, APAF1	111	72	7001	14.016	3.55049e-11	3.94496e-12	2.27263e-10
KEGG_PATHWAY	ssc05145:Toxoplasmosis	18	0.0852676	3.21641e-13	TNF, RELA, NFKBIA, BCL2L1, BIRC3, STAT1, TGFB1, IL10, STAT3, AKT1, MAPK1, CASP3, CASP9, BCL2, MAPK3, JAK1, MAPK8, ALOX5	111	105	7001	10.8124	6.27182e-11	6.27187e-12	4.01457e-10
KEGG_PATHWAY	ssc05206:MicroRNAs in cancer	24	0.11369	4.92718e-13	PRKCA, MCL1, PTGS2, MMP9, TP53, ITGB3, SIRT1, PTEN, STAT3, BCL2L11, BRCA1, PRKCB, CCNE2, BAK1, CCNE1, CASP3, CDKN1A, CCND1, ITGA5, CCND2, BCL2, VEGFA, MTOR, MYC	111	228	7001	6.63917	9.60798e-11	8.73457e-12	6.15008e-10
KEGG_PATHWAY	ssc04931:Insulin resistance	18	0.0852676	9.64256e-13	SREBF1, PPARA, IL6, TNF, RELA, PRKAG2, FOXO1, NFKBIA, PTEN, PRKCD, STAT3, AKT1, SLC2A4, SLC2A1, MAPK8, PTPN1, MTOR, NR1H3	111	112	7001	10.1366	1.88025e-10	1.56687e-11	1.20355e-09
KEGG_PATHWAY	ssc05210:Colorectal cancer	15	0.0710564	1.4635e-12	TP53, BIRC5, TGFB1, CTNNB1, AKT1, FOS, MAPK1, CASP3, CCND1, CASP9, BCL2, BAX, MAPK3, MAPK8, MYC	111	68	7001	13.913	2.85382e-10	2.19524e-11	1.82674e-09
KEGG_PATHWAY	ssc04210:Apoptosis	15	0.0710564	1.81236e-12	CFLAR, TNF, RELA, TP53, NFKBIA, BCL2L1, BIRC3, AKT1, CASP3, TNFSF10, CASP9, NTRK1, BCL2, BAX, APAF1	111	69	7001	13.7113	3.53404e-10	2.52431e-11	2.26215e-09
KEGG_PATHWAY	ssc05222:Small cell lung cancer	16	0.0757935	2.3969e-12	PTGS2, RELA, TP53, NFKBIA, BCL2L1, BIRC3, CDK4, PTEN, CCNE2, AKT1, CCNE1, CCND1, CASP9, BCL2, APAF1, MYC	111	85	7001	11.8724	4.67388e-10	3.11592e-11	2.99176e-09
KEGG_PATHWAY	ssc04932:Non-alcoholic fatty liver disease (NAFLD)	20	0.0947418	3.66465e-12	SREBF1, PPARA, IL6, TNF, RELA, PRKAG2, ADIPOR2, ADIPOR1, CXCL8, TGFB1, DDIT3, BCL2L11, AKT1, CDC42, CASP3, EIF2S1, BAX, MAPK8, IL1A, NR1H3	111	160	7001	7.88401	7.14602e-10	4.46626e-11	4.57417e-09
KEGG_PATHWAY	ssc04919:Thyroid hormone signaling pathway	17	0.0805306	1.42866e-11	PRKCA, ESR1, TP53, FOXO1, ITGB3, STAT1, CTNNB1, PRKCB, AKT1, MAPK1, CCND1, CASP9, SLC2A1, MAPK3, PRKACA, MTOR, MYC	111	113	7001	9.48872	2.78588e-09	1.63875e-10	1.78325e-08
KEGG_PATHWAY	ssc04066:HIF-1 signaling pathway	16	0.0757935	1.76643e-11	PRKCA, IL6, RELA, EDN1, RPS6, STAT3, PRKCB, AKT1, IGF1R, MAPK1, CDKN1A, BCL2, SLC2A1, VEGFA, MAPK3, MTOR	111	97	7001	10.4036	3.44454e-09	1.91363e-10	2.20486e-08
KEGG_PATHWAY	ssc05203:Viral carcinogenesis	20	0.0947418	5.41407e-11	CDK1, RELA, TP53, NFKBIA, PMAIP1, CDK4, STAT3, CCNE2, CDC42, CCNE1, MAPK1, BAK1, CASP3, CDKN1A, CCND1, CCND2, BAX, MAPK3, JAK1, PRKACA	111	186	7001	6.78194	1.05574e-08	5.55655e-10	6.75784e-08
KEGG_PATHWAY	ssc04668:TNF signaling pathway	16	0.0757935	8.67168e-11	CFLAR, IL6, TNF, CCL2, PTGS2, RELA, MMP9, EDN1, NFKBIA, BIRC3, AKT1, FOS, MAPK1, CASP3, MAPK3, MAPK8	111	108	7001	9.34401	1.69098e-08	8.45488e-10	1.0824e-07
KEGG_PATHWAY	ssc05214:Glioma	13	0.0615822	1.12771e-10	AKT1, PRKCA, MAPK1, IGF1R, CDKN1A, CCND1, MAPK3, TP53, TGFA, MTOR, CDK4, PTEN, PRKCB	111	61	7001	13.4416	2.19904e-08	1.04716e-09	1.40761e-07
KEGG_PATHWAY	ssc05219:Bladder cancer	11	0.052108	1.98388e-10	MAPK1, CDKN1A, CCND1, MMP9, MAPK3, VEGFA, TP53, CXCL8, CDK4, MMP2, MYC	111	38	7001	18.2577	3.86857e-08	1.75844e-09	2.47628e-07
KEGG_PATHWAY	ssc04920:Adipocytokine signaling pathway	13	0.0615822	7.27284e-10	PPARA, TNF, RELA, PRKAG2, ADIPOR2, NFKBIA, ADIPOR1, STAT3, AKT1, SLC2A4, SLC2A1, MAPK8, MTOR	111	71	7001	11.5484	1.4182e-07	6.16611e-09	9.07796e-07
KEGG_PATHWAY	ssc05160:Hepatitis C	16	0.0757935	9.03652e-10	PPARA, TNF, RELA, TP53, NFKBIA, CXCL8, STAT1, STAT3, AKT1, MAPK1, CDKN1A, EIF2S1, MAPK3, JAK1, MAPK8, NR1H3	111	127	7001	7.94609	1.76212e-07	7.34217e-09	1.12794e-06
KEGG_PATHWAY	ssc05202:Transcriptional misregulation in cancer	17	0.0805306	1.33596e-09	PLAT, IL6, RELA, MMP9, BCL2A1, PPARG, TP53, RUNX1T1, FOXO1, CXCL8, BCL2L1, DDIT3, IGF1R, CDKN1A, CCND2, NTRK1, MYC	111	152	7001	7.05411	2.60511e-07	1.04205e-08	1.66754e-06
KEGG_PATHWAY	ssc05140:Leishmaniasis	12	0.0568451	2.2592e-09	MAPK1, FOS, TNF, PTGS2, RELA, MAPK3, NFKBIA, JAK1, STAT1, TGFB1, IL1A, IL10	111	62	7001	12.2075	4.40544e-07	1.6944e-08	2.81993e-06
KEGG_PATHWAY	ssc04621:NOD-like receptor signaling pathway	11	0.052108	2.98601e-09	MAPK1, IL6, CCL2, TNF, HSP90AA1, RELA, MAPK3, CXCL8, NFKBIA, MAPK8, BIRC3	111	49	7001	14.159	5.82272e-07	2.15656e-08	3.72713e-06
KEGG_PATHWAY	ssc04510:Focal adhesion	18	0.0852676	6.18474e-09	PRKCA, ITGB3, HGF, BIRC3, PTEN, CTNNB1, PRKCB, AKT1, CDC42, IGF1R, MAPK1, CCND1, ITGA5, CCND2, BCL2, MAPK3, VEGFA, MAPK8	111	193	7001	5.88237	1.20602e-06	4.30723e-08	7.71978e-06
KEGG_PATHWAY	ssc05220:Chronic myeloid leukemia	12	0.0568451	7.39669e-09	AKT1, MAPK1, CDKN1A, CCND1, RELA, MAPK3, TP53, NFKBIA, BCL2L1, CDK4, MYC, TGFB1	111	69	7001	10.9691	1.44235e-06	4.97363e-08	9.23254e-06
KEGG_PATHWAY	ssc05142:Chagas disease (American trypanosomiasis)	14	0.0663193	9.17035e-09	CFLAR, IL6, CCL2, TNF, RELA, NFKBIA, CXCL8, TGFB1, IL10, AKT1, FOS, MAPK1, MAPK3, MAPK8	111	107	7001	8.25242	1.78822e-06	5.96072e-08	1.14464e-05
KEGG_PATHWAY	ssc05152:Tuberculosis	17	0.0805306	9.72922e-09	IL6, TNF, RELA, STAT1, TGFB1, IL10, AKT1, MAPK1, CASP3, CASP9, BCL2, BAX, MAPK3, JAK1, MAPK8, APAF1, IL1A	111	174	7001	6.16221	1.8972e-06	6.12e-08	1.2144e-05
KEGG_PATHWAY	ssc05133:Pertussis	12	0.0568451	1.36955e-08	MAPK1, FOS, CASP3, IL6, TNF, ITGA5, RELA, MAPK3, CXCL8, MAPK8, IL1A, IL10	111	73	7001	10.368	2.67061e-06	8.34567e-08	1.70947e-05
KEGG_PATHWAY	ssc05164:Influenza A	16	0.0757935	4.04317e-08	IL6, TNF, CCL2, RELA, NFKBIA, CXCL8, STAT1, AKT1, MAPK1, TNFSF10, CASP9, EIF2S1, MAPK3, JAK1, MAPK8, IL1A	111	167	7001	6.04283	7.88414e-06	2.38914e-07	5.04667e-05
KEGG_PATHWAY	ssc05166:HTLV-I infection	19	0.0900047	4.50139e-08	IL6, TNF, RELA, TP53, NFKBIA, BCL2L1, CDK4, TGFB1, CTNNB1, AKT1, FOS, CDKN1A, CCND1, CCND2, BAX, SLC2A1, JAK1, PRKACA, MYC	111	248	7001	4.83213	8.77767e-06	2.58168e-07	5.61863e-05
KEGG_PATHWAY	ssc04917:Prolactin signaling pathway	11	0.052108	6.1358e-08	AKT1, MAPK1, FOS, CCND1, CCND2, RELA, MAPK3, ESR1, MAPK8, STAT1, STAT3	111	66	7001	10.512	1.19647e-05	3.41852e-07	7.65869e-05
KEGG_PATHWAY	ssc05223:Non-small cell lung cancer	10	0.0473709	7.36101e-08	AKT1, PRKCA, MAPK1, CCND1, CASP9, MAPK3, TP53, TGFA, CDK4, PRKCB	111	51	7001	12.3671	1.43539e-05	3.98721e-07	9.188e-05
KEGG_PATHWAY	ssc05216:Thyroid cancer	8	0.0378967	1.00344e-07	MAPK1, CCND1, NTRK1, MAPK3, PPARG, TP53, MYC, CTNNB1	111	26	7001	19.4068	1.95669e-05	5.2884e-07	0.000125249
KEGG_PATHWAY	ssc04380:Osteoclast differentiation	14	0.0663193	1.28723e-07	TNF, RELA, PPARG, NFKBIA, ITGB3, STAT1, TGFB1, AKT1, FOS, MAPK1, MAPK3, JAK1, MAPK8, IL1A	111	133	7001	6.63917	2.51007e-05	6.60554e-07	0.000160672
KEGG_PATHWAY	ssc04010:MAPK signaling pathway	18	0.0852676	2.01574e-07	PRKCA, TNF, RELA, TP53, TGFB1, DDIT3, PRKCB, AKT1, CDC42, FOS, MAPK1, CASP3, NTRK1, MAPK3, PRKACA, MAPK8, MYC, IL1A	111	244	7001	4.65286	3.93062e-05	1.00787e-06	0.000251604
KEGG_PATHWAY	ssc04620:Toll-like receptor signaling pathway	12	0.0568451	4.23884e-07	AKT1, MAPK1, FOS, IL6, TNF, CD80, RELA, MAPK3, CXCL8, NFKBIA, MAPK8, STAT1	111	101	7001	7.49371	8.26539e-05	2.06643e-06	0.00052909
KEGG_PATHWAY	ssc04660:T cell receptor signaling pathway	12	0.0568451	5.1817e-07	AKT1, MAPK1, FOS, CDC42, TNF, RELA, MAPK3, NFKBIA, CDK4, IL10, CD28	111	103	7001	7.3482	0.000101038	2.46447e-06	0.000646778
KEGG_PATHWAY	ssc05213:Endometrial cancer	9	0.0426338	7.59323e-07	AKT1, MAPK1, CCND1, CASP9, MAPK3, TP53, MYC, PTEN, CTNNB1	111	49	7001	11.5847	0.000148057	3.52543e-06	0.000947783
KEGG_PATHWAY	ssc05323:Rheumatoid arthritis	11	0.052108	7.92423e-07	FOS, IL6, CCL2, TNF, CD80, VEGFA, CXCL8, TGFB1, IL1A, CD28	111	86	7001	8.06736	0.000154511	3.59354e-06	0.000989097
KEGG_PATHWAY	ssc04726:Serotonergic synapse	12	0.0568451	9.21472e-07	PRKCA, MAPK1, APP, CASP3, ALOX15, PTGS2, MAPK3, PTGS1, MAOB, PRKACA, ALOX5, PRKCB	111	109	7001	6.94371	0.000179671	4.08379e-06	0.00115017
KEGG_PATHWAY	ssc05218:Melanoma	10	0.0473709	9.54659e-07	AKT1, MAPK1, IGF1R, CDKN1A, CCND1, MAPK3, TP53, HGF, CDK4, PTEN	111	68	7001	9.2753	0.000186141	4.13685e-06	0.0011916
KEGG_PATHWAY	ssc04064:NF-kappa B signaling pathway	11	0.052108	1.09413e-06	CFLAR, TNF, CSNK2A1, PTGS2, BCL2, RELA, BCL2A1, CXCL8, NFKBIA, BCL2L1, BIRC3	111	89	7001	7.79542	0.000213333	4.63815e-06	0.00136568
KEGG_PATHWAY	ssc04071:Sphingolipid signaling pathway	12	0.0568451	1.21167e-06	AKT1, PRKCA, MAPK1, TNF, BCL2, RELA, BAX, MAPK3, TP53, MAPK8, PTEN, PRKCB	111	112	7001	6.75772	0.000236247	5.02712e-06	0.00151239
KEGG_PATHWAY	ssc04110:Cell cycle	12	0.0568451	1.57949e-06	CCNB1, CCNE2, CDK1, CCNE1, CDKN1A, CCND1, CCND2, TP53, CDK7, CDK4, MYC, TGFB1	111	115	7001	6.58143	0.000307953	6.41666e-06	0.0019715
KEGG_PATHWAY	ssc05221:Acute myeloid leukemia	9	0.0426338	1.64141e-06	AKT1, MAPK1, CCND1, RELA, MAPK3, RUNX1T1, MTOR, MYC, STAT3	111	54	7001	10.512	0.000320023	6.53212e-06	0.00204878
KEGG_PATHWAY	ssc04152:AMPK signaling pathway	12	0.0568451	1.8762e-06	AKT1, SREBF1, IGF1R, CCND1, SLC2A4, PRKAG2, PPARG, ADIPOR2, FOXO1, ADIPOR1, MTOR, SIRT1	111	117	7001	6.46893	0.000365793	7.31718e-06	0.00234185
KEGG_PATHWAY	ssc04722:Neurotrophin signaling pathway	12	0.0568451	2.04214e-06	AKT1, MAPK1, CDC42, BCL2, NTRK1, RELA, BAX, MAPK3, TP53, NFKBIA, MAPK8, PRKCD	111	118	7001	6.41411	0.000398139	7.80816e-06	0.00254897
KEGG_PATHWAY	ssc04370:VEGF signaling pathway	9	0.0426338	2.87041e-06	AKT1, PRKCA, MAPK1, CDC42, CASP9, PTGS2, MAPK3, VEGFA, PRKCB	111	58	7001	9.78705	0.000559575	1.0764e-05	0.00358279
KEGG_PATHWAY	ssc04150:mTOR signaling pathway	9	0.0426338	2.87041e-06	AKT1, PRKCA, MAPK1, TNF, MAPK3, MTOR, RPS6, PTEN, PRKCB	111	58	7001	9.78705	0.000559575	1.0764e-05	0.00358279
KEGG_PATHWAY	ssc05168:Herpes simplex infection	14	0.0663193	4.72828e-06	CDK1, IL6, CCL2, TNF, RELA, TP53, NFKBIA, STAT1, FOS, CASP3, CSNK2A1, EIF2S1, JAK1, MAPK8	111	182	7001	4.8517	0.000921592	1.73964e-05	0.00590168
KEGG_PATHWAY	ssc05230:Central carbon metabolism in cancer	9	0.0426338	4.8063e-06	AKT1, MAPK1, NTRK1, MAPK3, SLC2A1, TP53, MTOR, MYC, PTEN	111	62	7001	9.15562	0.000936791	1.7356e-05	0.00599905
KEGG_PATHWAY	ssc04910:Insulin signaling pathway	12	0.0568451	5.71021e-06	AKT1, SREBF1, MAPK1, SLC2A4, MAPK3, PRKAG2, FOXO1, MAPK8, PRKACA, MTOR, PTPN1, RPS6	111	131	7001	5.77759	0.00111287	2.02451e-05	0.00712724
KEGG_PATHWAY	ssc05211:Renal cell carcinoma	9	0.0426338	6.13021e-06	AKT1, MAPK1, CDC42, MAPK3, SLC2A1, VEGFA, TGFA, HGF, TGFB1	111	64	7001	8.86951	0.00119468	2.13461e-05	0.00765145
KEGG_PATHWAY	ssc04012:ErbB signaling pathway	10	0.0473709	6.38666e-06	AKT1, PRKCA, MAPK1, CDKN1A, MAPK3, TGFA, MAPK8, MTOR, MYC, PRKCB	111	85	7001	7.42024	0.00124463	2.18489e-05	0.00797153
KEGG_PATHWAY	ssc05020:Prion diseases	7	0.0331596	1.02888e-05	MAPK1, IL6, BAX, MAPK3, PRKACA, HSPA5, IL1A	111	33	7001	13.3789	0.00200432	3.45913e-05	0.0128417
KEGG_PATHWAY	ssc04915:Estrogen signaling pathway	10	0.0473709	1.74189e-05	AKT1, MAPK1, FOS, HSP90AA1, MMP9, MAPK3, ESR1, PRKACA, MMP2, PRKCD	111	96	7001	6.57001	0.00339095	5.75697e-05	0.02174
KEGG_PATHWAY	ssc05014:Amyotrophic lateral sclerosis (ALS)	8	0.0378967	2.12756e-05	CASP3, TNF, CASP9, BCL2, BAX, TP53, APAF1, BCL2L1	111	55	7001	9.17412	0.00414019	6.91439e-05	0.0265529
KEGG_PATHWAY	ssc05146:Amoebiasis	10	0.0473709	3.32491e-05	PRKCA, CASP3, IL6, TNF, RELA, CXCL8, PRKACA, TGFB1, IL10, PRKCB	111	104	7001	6.06462	0.00646271	0.000106284	0.0414936
KEGG_PATHWAY	ssc05132:Salmonella infection	9	0.0426338	3.57094e-05	MAPK1, FOS, CDC42, IL6, RELA, MAPK3, CXCL8, MAPK8, IL1A	111	81	7001	7.00801	0.00693927	0.000112307	0.0445633
KEGG_PATHWAY	ssc05321:Inflammatory bowel disease (IBD)	8	0.0378967	4.23315e-05	IL6, TNF, RELA, STAT1, TGFB1, IL1A, IL10, STAT3	111	61	7001	8.27175	0.00822083	0.00013102	0.0528252
KEGG_PATHWAY	ssc05134:Legionellosis	8	0.0378967	4.71074e-05	CASP3, IL6, TNF, CASP9, RELA, CXCL8, NFKBIA, APAF1	111	62	7001	8.13833	0.00914409	0.000143523	0.0587835
KEGG_PATHWAY	ssc04914:Progesterone-mediated oocyte maturation	9	0.0426338	6.0007e-05	CCNB1, AKT1, CDK1, MAPK1, IGF1R, HSP90AA1, MAPK3, MAPK8, PRKACA	111	87	7001	6.5247	0.0116335	0.00018001	0.0748749
KEGG_PATHWAY	ssc05169:Epstein-Barr virus infection	10	0.0473709	6.88379e-05	AKT1, CDKN1A, BCL2, RELA, TP53, NFKBIA, JAK1, MAPK8, MYC, STAT3	111	114	7001	5.53264	0.0133341	0.000203371	0.0858894
KEGG_PATHWAY	ssc04062:Chemokine signaling pathway	12	0.0568451	7.80639e-05	AKT1, MAPK1, CDC42, CCL2, RELA, MAPK3, CCR2, CXCL8, NFKBIA, PRKACA, STAT1, STAT3	111	173	7001	4.37494	0.0151078	0.000227184	0.0973956
KEGG_PATHWAY	ssc04930:Type II diabetes mellitus	7	0.0331596	0.000105922	MAPK1, TNF, SLC2A4, MAPK3, MAPK8, MTOR, PRKCD	111	49	7001	9.0103	0.0204441	0.000303718	0.132132
KEGG_PATHWAY	ssc05144:Malaria	7	0.0331596	0.000148429	IL6, CCL2, TNF, CXCL8, HGF, TGFB1, IL10	111	52	7001	8.49047	0.0285308	0.000419416	0.185111
KEGG_PATHWAY	ssc04310:Wnt signaling pathway	10	0.0473709	0.000149524	PRKCA, CCND1, CSNK2A1, CCND2, TP53, MAPK8, PRKACA, MYC, PRKCB, CTNNB1	111	126	7001	5.00572	0.0287383	0.000416475	0.186475
KEGG_PATHWAY	ssc04014:Ras signaling pathway	13	0.0615822	0.000159496	PRKCA, RELA, BCL2L1, HGF, PRKCB, AKT1, CDC42, IGF1R, MAPK1, MAPK3, VEGFA, PRKACA, MAPK8	111	220	7001	3.72699	0.0306255	0.000437992	0.198901
KEGG_PATHWAY	ssc05332:Graft-versus-host disease	6	0.0284225	0.000169138	IL6, TNF, CD80, IL1A, CD28	111	34	7001	11.1304	0.0324466	0.000458015	0.210912
KEGG_PATHWAY	ssc04630:Jak-STAT signaling pathway	10	0.0473709	0.00033127	AKT1, CCND1, IL6, CCND2, JAK1, BCL2L1, STAT1, MYC, IL10, STAT3	111	140	7001	4.50515	0.0625655	0.000884654	0.412705
KEGG_PATHWAY	ssc04672:Intestinal immune network for IgA production	6	0.0284225	0.000522959	IL6, CD80, TGFB1, IL10, CD28	111	43	7001	8.80075	0.0969738	0.00137748	0.650801
KEGG_PATHWAY	ssc04921:Oxytocin signaling pathway	10	0.0473709	0.000550792	PRKCA, MAPK1, FOS, CDKN1A, CCND1, PTGS2, MAPK3, PRKAG2, PRKACA, PRKCB	111	150	7001	4.2048	0.101864	0.00143143	0.685328
KEGG_PATHWAY	ssc05231:Choline metabolism in cancer	8	0.0378967	0.000784156	AKT1, PRKCA, MAPK1, FOS, MAPK3, MAPK8, MTOR, PRKCB	111	97	7001	5.20182	0.141845	0.00201074	0.974388
KEGG_PATHWAY	ssc04520:Adherens junction	7	0.0331596	0.000820195	MAPK1, IGF1R, CDC42, CSNK2A1, MAPK3, PTPN1, CTNNB1	111	71	7001	6.21837	0.147859	0.00207581	1.01896
KEGG_PATHWAY	ssc04913:Ovarian steroidogenesis	6	0.0284225	0.00115523	IGF1R, CYP1A1, PTGS2, PRKACA, ALOX5, CYP19A1	111	51	7001	7.42024	0.201804	0.00288558	1.43243
KEGG_PATHWAY	ssc04015:Rap1 signaling pathway	11	0.052108	0.0014132	AKT1, PRKCA, MAPK1, IGF1R, CDC42, MAPK3, VEGFA, ITGB3, HGF, PRKCB, CTNNB1	111	206	7001	3.36793	0.241011	0.00348465	1.74971
KEGG_PATHWAY	ssc04725:Cholinergic synapse	8	0.0378967	0.00173233	AKT1, PRKCA, MAPK1, FOS, BCL2, MAPK3, PRKACA, PRKCB	111	111	7001	4.54573	0.286873	0.00421729	2.14091
KEGG_PATHWAY	ssc04666:Fc gamma R-mediated phagocytosis	7	0.0331596	0.00174446	AKT1, PRKCA, MAPK1, CDC42, MAPK3, PRKCD, PRKCB	111	82	7001	5.3842	0.288562	0.00419448	2.15576
KEGG_PATHWAY	ssc05143:African trypanosomiasis	5	0.0236855	0.00186093	PRKCA, IL6, TNF, IL10, PRKCB	111	34	7001	9.2753	0.304566	0.00441971	2.29815
KEGG_PATHWAY	ssc04540:Gap junction	7	0.0331596	0.00250256	PRKCA, CDK1, MAPK1, MAPK3, GJA1, PRKACA, PRKCB	111	88	7001	5.0171	0.386522	0.00586958	3.0792
KEGG_PATHWAY	ssc05330:Allograft rejection	5	0.0236855	0.00255621	TNF, CD80, IL10, CD28	111	37	7001	8.52325	0.392923	0.00592404	3.14425
KEGG_PATHWAY	ssc05416:Viral myocarditis	6	0.0284225	0.0027762	CASP3, CCND1, CASP9, CD80, CD28	111	62	7001	6.10375	0.418481	0.00635748	3.41055
KEGG_PATHWAY	ssc00590:Arachidonic acid metabolism	6	0.0284225	0.0027762	ALOX15, CBR1, PTGES2, PTGS2, PTGS1, ALOX5	111	62	7001	6.10375	0.418481	0.00635748	3.41055
KEGG_PATHWAY	ssc05031:Amphetamine addiction	6	0.0284225	0.00319103	PRKCA, FOS, MAOB, PRKACA, SIRT1, PRKCB	111	64	7001	5.91301	0.463799	0.00722085	3.91088
KEGG_PATHWAY	ssc04916:Melanogenesis	7	0.0331596	0.00330451	PRKCA, MAPK1, MAPK3, EDN1, PRKACA, PRKCB, CTNNB1	111	93	7001	4.74736	0.475572	0.00739147	4.04733
KEGG_PATHWAY	ssc04141:Protein processing in endoplasmic reticulum	9	0.0426338	0.00342314	BAK1, HSP90AA1, EIF2S1, BCL2, BAX, MAPK8, NFE2L2, HSPA5, DDIT3	111	159	7001	3.57012	0.487604	0.00756959	4.18979
KEGG_PATHWAY	ssc04723:Retrograde endocannabinoid signaling	7	0.0331596	0.00348554	PRKCA, MAPK1, PTGS2, MAPK3, MAPK8, PRKACA, PRKCB	111	94	7001	4.69686	0.493823	0.00762102	4.26464
KEGG_PATHWAY	ssc04922:Glucagon signaling pathway	7	0.0331596	0.00367387	AKT1, PPARA, SLC2A1, PRKAG2, FOXO1, PRKACA, SIRT1	111	95	7001	4.64742	0.512138	0.00794299	4.49023
KEGG_PATHWAY	ssc04940:Type I diabetes mellitus	5	0.0236855	0.00373563	TNF, CD80, IL1A, CD28	111	41	7001	7.69172	0.518	0.00798784	4.5641
KEGG_PATHWAY	ssc04713:Circadian entrainment	7	0.0331596	0.0040731	PRKCA, MAPK1, FOS, MAPK3, MTNR1B, PRKACA, PRKCB	111	97	7001	4.55159	0.548814	0.00861352	4.96683
KEGG_PATHWAY	ssc04550:Signaling pathways regulating pluripotency of stem cells	8	0.0378967	0.00422502	AKT1, MAPK1, IGF1R, MAPK3, JAK1, MYC, STAT3, CTNNB1	111	130	7001	3.88136	0.562039	0.0088384	5.14762
KEGG_PATHWAY	ssc04662:B cell receptor signaling pathway	6	0.0284225	0.00499716	AKT1, MAPK1, FOS, RELA, MAPK3, NFKBIA	111	71	7001	5.33003	0.623519	0.0103386	6.06159
KEGG_PATHWAY	ssc04650:Natural killer cell mediated cytotoxicity	7	0.0331596	0.00686687	PRKCA, MAPK1, CASP3, TNFSF10, TNF, MAPK3, PRKCB	111	108	7001	4.088	0.73911	0.0140442	8.24129
KEGG_PATHWAY	ssc04114:Oocyte meiosis	7	0.0331596	0.00717605	CCNE2, CDK1, MAPK1, CCNE1, IGF1R, MAPK3, PRKACA	111	109	7001	4.0505	0.754479	0.0145224	8.59722
KEGG_PATHWAY	ssc05410:Hypertrophic cardiomyopathy (HCM)	6	0.0284225	0.00743203	IL6, TNF, ITGA5, PRKAG2, ITGB3, TGFB1	111	78	7001	4.8517	0.76652	0.0148846	8.89094
KEGG_PATHWAY	ssc04270:Vascular smooth muscle contraction	7	0.0331596	0.00962947	PRKCA, AGTR1, MAPK1, MAPK3, PRKACA, PRKCD, PRKCB	111	116	7001	3.80607	0.848451	0.0190694	11.3769
KEGG_PATHWAY	ssc04728:Dopaminergic synapse	7	0.0331596	0.0104286	AKT1, PRKCA, FOS, MAOB, MAPK8, PRKACA, PRKCB	111	118	7001	3.74156	0.870524	0.0204374	12.2654
KEGG_PATHWAY	ssc04912:GnRH signaling pathway	6	0.0284225	0.010594	MAPK1, CDC42, MAPK3, MAPK8, PRKACA, MMP2	111	85	7001	4.45215	0.874676	0.0205544	12.4482
KEGG_PATHWAY	ssc04024:cAMP signaling pathway	9	0.0426338	0.012417	AKT1, MAPK1, FOS, PPARA, RELA, MAPK3, NFKBIA, MAPK8, PRKACA	111	198	7001	2.86691	0.912532	0.0238349	14.4406
KEGG_PATHWAY	ssc04060:Cytokine-cytokine receptor interaction	9	0.0426338	0.0135045	TNFSF10, IL6, CCL2, TNF, CCR2, CXCL8, TGFB1, IL1A, IL10	111	201	7001	2.82412	0.929442	0.0256585	15.6092
KEGG_PATHWAY	ssc04730:Long-term depression	5	0.0236855	0.0135385	PRKCA, MAPK1, IGF1R, MAPK3, PRKCB	111	59	7001	5.34509	0.929915	0.0254761	15.6455
KEGG_PATHWAY	ssc04664:Fc epsilon RI signaling pathway	5	0.0236855	0.0168962	AKT1, MAPK1, TNF, MAPK3, MAPK8	111	63	7001	5.00572	0.963952	0.031446	19.1601
KEGG_PATHWAY	ssc05010:Alzheimer's disease	8	0.0378967	0.0199232	MAPK1, APP, CASP3, TNF, CASP9, MAPK3, SNCA, APAF1	111	175	7001	2.88329	0.980243	0.036684	22.2127
KEGG_PATHWAY	ssc04390:Hippo signaling pathway	7	0.0331596	0.0205048	CCND1, CCND2, BBC3, BIRC5, MYC, TGFB1, CTNNB1	111	137	7001	3.22266	0.982403	0.0373961	22.7869
KEGG_PATHWAY	ssc04720:Long-term potentiation	5	0.0236855	0.0207336	PRKCA, MAPK1, MAPK3, PRKACA, PRKCB	111	67	7001	4.70687	0.983186	0.0374631	23.0118
KEGG_PATHWAY	ssc04622:RIG-I-like receptor signaling pathway	5	0.0236855	0.02177	TNF, RELA, CXCL8, NFKBIA, MAPK8	111	68	7001	4.63765	0.986323	0.0389618	24.0226
KEGG_PATHWAY	ssc04961:Endocrine and other factor-regulated calcium reabsorption	4	0.0189484	0.0261095	PRKCA, ESR1, PRKACA, PRKCB	111	41	7001	6.15337	0.994253	0.0462277	28.1241
KEGG_PATHWAY	ssc04960:Aldosterone-regulated sodium reabsorption	4	0.0189484	0.0261095	PRKCA, MAPK1, MAPK3, PRKCB	111	41	7001	6.15337	0.994253	0.0462277	28.1241
KEGG_PATHWAY	ssc04750:Inflammatory mediator regulation of TRP channels	6	0.0284225	0.0271638	PRKCA, NTRK1, MAPK8, PRKACA, PRKCD, PRKCB	111	108	7001	3.504	0.995347	0.0476477	29.0893
KEGG_PATHWAY	ssc04350:TGF-beta signaling pathway	5	0.0236855	0.0325252	MAPK1, TNF, MAPK3, MYC, TGFB1	111	77	7001	4.09559	0.998416	0.0564338	33.8158
KEGG_PATHWAY	ssc04670:Leukocyte transendothelial migration	6	0.0284225	0.0343444	PRKCA, CDC42, MMP9, MMP2, PRKCB, CTNNB1	111	115	7001	3.29072	0.998903	0.0590328	35.3525
KEGG_PATHWAY	ssc04640:Hematopoietic cell lineage	5	0.0236855	0.0366924	IL6, TNF, ITGA5, ITGB3, IL1A	111	80	7001	3.942	0.999317	0.0624729	37.2874
KEGG_PATHWAY	ssc05016:Huntington's disease	8	0.0378967	0.0367094	CASP3, CASP9, BBC3, BAX, PPARG, TP53, APAF1, SOD2	111	199	7001	2.53556	0.99932	0.0619705	37.3012
KEGG_PATHWAY	ssc05414:Dilated cardiomyopathy	5	0.0236855	0.0411544	TNF, ITGA5, PRKACA, ITGB3, TGFB1	111	83	7001	3.79952	0.999724	0.0687804	40.8183
KEGG_PATHWAY	ssc05320:Autoimmune thyroid disease	4	0.0189484	0.0434077	CD80, IL10, CD28	111	50	7001	5.04577	0.999826	0.0718863	42.5311
